# Supplementary material for: Locus-specific ChIP combined with NGS analysis reveals genomic regulatory regions that physically interact with the Pax5 promoter in a chicken B cell line
Source: PubMed Central journal article supplement (PMC5737561; doi:10.1093/dnares/dsx023), 2017-06-06

# Identification of physical interactions between genomic regions by enChIP-Seq

Toshitsugu Fujita, Miyuki Yuno, Yutaka Suzuki, Sumio Sugano, and Hodaka Fujii\*

Toshitsugu Fujita, Miyuki Yuno, Hodaka Fujii

Chromatin Biochemistry Research Group, Combined Program on Microbiology and Immunology,  
Research Institute for Microbial Diseases, Osaka University, Suita, Osaka, Japan

Yutaka Suzuki, Sumio Sugano

Department of Medical Genome Sciences, Graduate School of Frontier Sciences, The University  
of Tokyo, Kashiwa, Chiba, Japan

Department of Medical Genome Sciences, Graduate School of Frontier Sciences, The University  
of Tokyo, Minato-ku, Tokyo, Japan

\*Corresponding author

E-mail: [hodaka@biken.osaka-u.ac.jp](mailto:hodaka@biken.osaka-u.ac.jp)

Chromatin Biochemistry Research Group, Combined Program on Microbiology and Immunology,  
Research Institute for Microbial Diseases, Osaka University  
3-1 Yamadaoka, Suita, Osaka 565-0871, Japan

Short title:

enChIP-Seq to map genomic organization

## Abstract

Physical interactions between genomic regions play critical roles in the regulation of genome functions, including gene expression. Here, we demonstrate the feasibility of using engineered DNA-binding molecule-mediated chromatin immunoprecipitation (enChIP) in combination with next-generation sequencing (NGS) (enChIP-Seq) to detect such interactions. In enChIP-Seq, the target genomic region is captured by an engineered DNA-binding complex, such as a clustered regularly interspaced short palindromic repeats (CRISPR) system consisting of a catalytically inactive form of Cas9 and a single guide RNA. Subsequently, the genomic regions that physically interact with the target genomic region in the captured complex are sequenced by NGS. Using enChIP-Seq, we found that the 5'HS5 locus, which is involved in the regulation of *globin* genes expression at the  *$\beta$ -globin* locus, interacts with multiple genomic regions upon erythroid differentiation in the human erythroleukemia cell line K562. Genes near the genomic regions inducibly associated with the 5'HS5 locus were transcriptionally up-regulated in the differentiated state, suggesting the existence of a coordinated transcription mechanism mediated by physical interactions between these loci. Thus, enChIP-Seq might be a potentially useful tool for detecting physical interactions between genomic regions in a non-biased manner, which would facilitate elucidation of the molecular mechanisms underlying regulation of genome functions.

## Introduction

Physical interactions between genomic regions play important roles in the regulation of genome functions, including transcription and epigenetic regulation (Williams *et al.* 2010). Several techniques, such as fluorescence *in situ* hybridization (FISH) (Fraser & Bickmore 2007), chromosome conformation capture (3C), and 3C-derived methods (Dekker *et al.* 2002; de Wit & de Laat 2012), have been used to detect such interactions. Although these techniques are widely used, they have certain limitations. The resolution of FISH is low, i.e., apparent co-localization of FISH signals does not necessarily mean that the loci in question physically interact. In addition, FISH cannot be used in a non-biased search for interacting genomic regions. In 3C and related methods, molecular interactions are maintained by crosslinking with formaldehyde prior to digestion with a restriction enzyme(s). The digested DNA is purified after ligation of the DNA ends within the same complex. Interaction between genomic loci is detected by PCR using locus-specific primers or next-generation sequencing (NGS). As with FISH, 3C-based approaches also have intrinsic drawbacks. For example, these methods require enzymatic reactions, including digestion with restriction enzyme(s) and ligation of crosslinked chromatin; the difficulty of achieving complete digestion of crosslinked chromatin can result in detection of artifactual interactions. In addition, in 3C and its derivatives, it is difficult to distinguish the products of intra-molecular and inter-molecular ligation reactions, although several attempts to overcome these problems have been reported (Kalhor *et al.* 2011; Nagano *et al.* 2015). These drawbacks of 3C-based methods make it potentially difficult to ensure that the detected signals truly reflect physical interactions between different genomic regions.

An alternative approach to detecting physical interactions between genomic regions is to purify specific genomic regions engaged in molecular interactions and then analyze the genomic DNA in the purified complexes. To purify specific genomic regions, we recently developed two locus-specific chromatin immunoprecipitation (locus-specific ChIP) technologies, insertional ChIP (iChIP) (Hoshino & Fujii 2009; Fujita & Fujii 2011, 2012a, 2014a; Fujita *et al.* 2015a) (see review (Fujita & Fujii 2016)) and engineered DNA-binding molecule-mediated ChIP (enChIP) (Fujita *et al.* 2013; Fujita & Fujii 2013, 2014b; Fujita *et al.* 2015b; Fujita *et al.* 2016b, 2016a) (see reviews (Fujii & Fujita 2015; Fujita & Fujii 2015)). enChIP consists of the following steps (Fig. 1): (i) A DNA-binding molecule or complex (DB) that recognizes a target DNA sequence in a genomic region of interest is engineered. Zinc-finger proteins (Pabo *et al.* 2001), transcription activator-like (TAL) proteins (Bogdanove & Voytas 2011), and a clustered regularly interspaced short palindromic repeats (CRISPR) system (Qi *et al.* 2013) consisting of a catalytically inactive Cas9 (dCas9) plus a single guide RNA (sgRNA) can be used as the DB. Tag(s) and a nuclear localization signal (NLS)(s) can be fused with the engineered DB; (ii) The fusion protein(s) are expressed in the cells of interest; and (iii) If necessary, the DB-expressing cells are stimulated and crosslinked with formaldehyde or other crosslinkers. The cells are lysed, and chromatin is fragmented by sonication or digested with nucleases. (iv) Chromatin complexes containing the engineered DB are affinity-purified by immunoprecipitation or other methods. (v) After reverse crosslinking (if necessary), DNA, RNA, proteins, or other molecules are purified and identified by various methods including NGS and mass spectrometry (MS).

As a model locus in this study, we focused on 5'HS, an extensively analyzed locus that has shown to regulate expression of *globin* genes at the  $\beta$ -*globin* locus during development (Fig. 2a) (Ghirlando *et al.* 2012; Holwerda & de Laat 2013). The 5'HS2-4 regions in the 5'HS locus

behave as enhancers for expression of the *globin* genes (Caterina *et al.* 1991; Peterson *et al.* 1996; Navas *et al.* 2001). By contrast, 5'HS5 functions as an insulator to prevent invasion of heterochromatin into the  *$\beta$ -globin* locus (Farrell *et al.* 2002). In addition, the 5'HS5 locus interacts with the 3'HS1 locus in the 3' region of the  *$\beta$ -globin* locus (Dostie *et al.* 2006; Chien *et al.* 2011). Moreover, CTCF, a major component of the insulator complex, plays a critical role in insulation and formation of a chromatin loop (Farrell *et al.* 2002; Chien *et al.* 2011). However, the molecular mechanisms underlying the functions of 5'HS5 remain incompletely understood.

Here, we combined enChIP with NGS (enChIP-Seq) to detect genomic regions that physically interact with the 5'HS5 locus. Using enChIP-Seq, we showed that the 5'HS5 locus physically interacts with multiple genomic regions upon erythroid differentiation in the human erythroleukemia cell line K562. Thus, enChIP-Seq represents a potentially useful tool for analysis of genome functions.

## **Results and Discussion**

### **Isolation of the 5'HS5 locus by enChIP using the CRISPR system**

To purify the 5'HS5 locus by enChIP using the CRISPR system (Figs. 1 and 2a) (Fujita & Fujii 2013, 2014b), we generated human erythroleukemia K562-derived cells expressing 3xFLAG-dCas9 (Fujita & Fujii 2014b) and sgRNA targeting the 5'HS5 locus (Fig. 2a). We designed two sgRNAs (#6 and #17) to target different sites in the 5'HS5 locus separated by 52 bp (Fig. 2b). These target sites were taken from a region 0.3 - 0.4 kb downstream of the CTCF-binding site and 5'HS5 core site to prevent CRISPR complex binding from influencing the intrinsic functions of the 5'HS5 locus. Like the parental K562 cells, the derivative cells were white, suggesting that they did not spontaneously express *globin* genes as a result of introduction of the CRISPR complex or its binding to the target locus. Crosslinked chromatin was fragmented by sonication and subjected to affinity purification with anti-FLAG antibody (Ab) (Fig. 1b). Subsequently, crosslinking was reversed and DNA was purified from the isolated chromatin. As shown in Fig. 2c, 0.1-0.4% of the input 5'HS5 locus was isolated, whereas the irrelevant *SOX2* locus was not enriched, suggesting that enChIP using either of the two sgRNAs (#6 and #17) could isolate the 5'HS5 locus.

### **Detection of genomic regions that physically interact with the 5'HS5 locus**

To identify genomic regions associated with the 5'HS5 locus on a genome-wide scale in erythroid cells under undifferentiated or differentiated conditions, K562-derived cells were mock-treated or treated with sodium butyrate (NaB) for 4 days before being crosslinked with formaldehyde and subjected to enChIP. The K562-derived cells changed from white to pink upon

NaB treatment, suggesting that they had begun to express the *globin* genes, as wild-type K562 cells do in response to NaB. After isolating the 5'HS5 locus by enChIP, we subjected the purified DNA to NGS analysis. As expected, reads corresponding to the 5'HS5 locus were clearly detected in cells expressing either sgRNA #6 or #17, but not in cells expressing neither sgRNA (Fig. 2d and Table 1). By contrast, no peak was detected at the irrelevant *Sox2* locus (Fig. 2e). To identify genomic regions physically interacting with 5'HS5 upon erythroid differentiation, we analyzed the NGS peaks observed in the differentiated state. The CRISPR complex can interact with multiple genomic sites containing sequences similar to the sgRNA sequence (Cencic *et al.* 2014; Kuscü *et al.* 2014; Wu *et al.* 2014; O'Green *et al.* 2015). In addition, in the absence of sgRNA, it is possible that dCas9 could bind non-specifically to some genomic sites *in vivo*. Therefore, the peaks identified for sgRNA #6 and #17 may include such off-target sites. To remove those off-target sites, we first eliminated peaks derived from non-specific binding of dCas9 in the absence of sgRNA from those identified for each sgRNA (Steps 1 and 2 in Fig. 3). To identify peaks with confidence, we next established two criteria for choosing peaks based on NGS information from the target 5'HS5 locus: (i) tag number >5% of that of the target 5'HS5 locus, and (ii) fold enrichment relative to input genomic DNA >10. As shown in Fig. 3 (Step 2), 19 and 228 peaks for sgRNA #6 and #17, respectively, fulfilled these criteria. Next, to eliminate sgRNA-dependent off-target sites, we compared the peaks for sgRNA #6 and #17 and selected peaks detected in common by both sgRNA #6 and #17. These peaks were considered to represent regions engaged in bona fide physical interactions with the 5'HS5 locus (Step 3 in Fig. 3). The six identified peaks could be classified into two categories: (i) peaks that were larger in the differentiated state, and (ii) peaks constitutively observed in both the undifferentiated and differentiated states. The first category should contain genomic regions that inducibly associate with the 5'HS5 locus upon erythroid differentiation, whereas the second category should contain

genomic regions constitutively associated with the 5'HS5 locus. To extract the peaks that grew larger specifically in the differentiated state, we selected peaks observed constitutively or in the undifferentiated state (Step 4 in Fig. 3) and compared them with the six peaks extracted in Step 3 (Step 5 in Fig. 3). As shown in Fig. 3 (Step 5) and Table 2, the 5'HS5 site was the unique peak constitutively observed in the undifferentiated and differentiated states, whereas the five other peaks were larger specifically in the differentiated state. These included one intra-chromosomal interaction and four inter-chromosomal interactions (Table 2); the two peaks on chromosome 1 corresponding to inter-chromosomal interactions were adjacent to each other in the primary sequence. As for the associated genomic regions, their tag numbers were much lower than those of the target genomic region (Tables 1 and 2). This is reasonable considering that associated genomic regions are likely to have been indirectly purified by enChIP. In other words, not all complexes of the target genomic region would be expected to contain associated genomic regions. The binding stoichiometry of the associated genomic regions could be affected by multiple factors, such as the cell cycle phase the cells were in at the time of harvesting. Next, we attempted to extract genomic regions that interacted with the 5'HS5 locus specifically in the undifferentiated state. However, bioinformatics analysis based on the aforementioned criteria identified no regions in this category (Supplementary Fig. S1).

We visualized some of the identified peaks in the UCSC Genome Browser (Fig. 4). The peaks were clearly visible for both sgRNA #6 and #17. The adjacent NaB-specific peaks in chromosome 1 were both located in the first intron of the *ZNF670* and *ZNF670-ZNF695* genes. The other NaB-specific peaks were located in the vicinity of the *MIR422A* gene in chromosome 15 and between the *TMEM151A* and *YIF1A* genes in chromosome 11.



To confirm the interactions identified by enChIP-Seq, we used the ligation-mediated approach used in 3C-based assays (Supplementary Fig. S2). In this approach, cells are subjected to crosslinking, and then chromatin is randomly fragmented by sonication. After proximity ligation of genomic DNA, the junction between the target locus and a potential interacting site is amplified by PCR. Subsequently, a part of the amplified region in the potential interacting locus is detected by a second PCR. Amplification of a region in the second PCR suggests that the potential interacting locus is physically proximal to the target locus. When we used this assay to examine the interaction between the 5'HS5 locus and the *ZNF670/ZNF670-ZNF695* locus, the second PCR amplified the *ZNF670/ZNF670-ZNF695* locus in an NaB-specific manner only when the proximal ligation step was performed (Fig. 5a and Supplementary Fig. S3a). This observation is consistent with the enChIP-Seq result (Fig. 4), showing that the 5'HS5 locus interacts with the *ZNF670/ZNF670-ZNF695* locus in the differentiated state in K562 cells. In addition, we observed similar results for *MIR422A* and *YIF1A* loci (Fig. 5b and c and Supplementary Fig. S3b and c). Thus, we were able to confirm the chromosomal interactions identified by enChIP-Seq by another independent method, suggesting that it is feasible to use enChIP-Seq to perform non-biased identification of physical interactions between genomic regions. It is an interesting future issue how interactions between 5'HS5 and these regions are mediated.

Transcription of genes near the 5'HS5-interacting genomic regions identified by enChIP-Seq could be directly or indirectly regulated by the induced association with the 5'HS locus. Such regulation could involve the 5'HS2-4 regions, which function as enhancers (Caterina *et al.* 1991; Peterson *et al.* 1996; Navas *et al.* 2001). Therefore, we investigated whether mRNA levels of the genes in the vicinity ( $\pm 10$  kb) of the 5'HS5-interacting genomic regions changed after NaB treatment. As shown in Fig. 6, mRNA levels of the *ZNF670*, *MIR422A*, and *CNIH2* genes were

clearly up-regulated in the NaB-induced differentiated state, suggesting that the identified chromosomal interactions are involved in transcriptional regulation of these genes. At this time, it is not clear whether these gene products play any roles in erythroid development. Future studies should attempt to elucidate how the 5'HS locus regulates transcription of these genes. It is possible that the enhancer function of the 5'HS locus directly activates transcription of these genes via interactions with their promoters under differentiated conditions. Alternatively, these loci could be incorporated into the “transcription factory” (Deng *et al.* 2013) upon erythroid differentiation, independent of the enhancer function of the 5'HS locus. In this regard, it is interesting that expression of the *YIF1A* gene, which is closer to the region interacting with 5'HS5, is not induced by NaB treatment, whereas expression of the *CNIH2* gene, which is more distal to the interacting region, is markedly induced. There would be a couple of possibilities to explain differential effects of interaction of 5'HS5 to this genomic region on expression of genes in the vicinity. First, interactions of 5'HS5 might not be the sole determinant of gene expression of the nearby genes. It might be possible that transcription factors essential for *YIF1A* might not be expressed in this cell line. Alternatively, *YIF1A* transcription might be actively repressed by repressor factors. Mechanisms of differential regulation of gene expression of this locus would be an interesting future issue.

### **Interactions between the 5'HS5 locus and globin genes**

Studies using 3C and 3C-derived methods suggested that the 5'HS5 locus and *globin* genes (*HBG1* and *HBG2* genes) at the  $\beta$ -*globin* locus interact (Dostie *et al.* 2006; Chien *et al.* 2011). Therefore, we sought to detect a physical interaction between these loci by enChIP-Seq. As shown in Fig. 3 and Table 2, bioinformatics analysis based on the criteria described above (fold enrichment: >10, tag number: >5% of that of the target positions) did not extract genomic regions

around the *HBG1* and *HBG2* genes. In fact, the peak images did not indicate any physical interactions between 5'HS5 and those genes (Supplementary Fig. S4). However, because (1) DNA sequences of *HBG1* and *HBG2* genes show high identity (98%, Supplementary Fig. S5) and (2) multiple mapped reads (NGS reads mapped to multiple loci) cannot be mapped to a reference genome in a standard analytical setting, our NGS data analysis may lack reference information on *HBG1* and *HBG2* genes. Therefore, we manually counted and analyzed the NGS reads corresponding to the DNA sequences of *HBG1* and *HBG2* genes. We counted NGS reads around their transcription start sites (TSSs) ( $\pm 0.5$  kb), because (1) in general, transcriptional regulatory elements interact with the promoter regions of their target genes to regulate transcription and (2) high DNA sequence identity is detected up to  $\sim 0.5$  kb upstream from the TSSs (Supplementary Fig. S5). As shown in Fig. 7 and Supplementary Table S3, the corresponding NGS reads were enriched in enChIP using sgRNA#6 (2.3-fold enrichment with respect to input reads) and sgRNA#17 (4.0-fold enrichment) in an NaB-specific manner. Such enrichment was not observed in enChIP without sgRNA. We also manually counted NGS reads corresponding to DNA sequences of two irrelevant genes, *interferon  $\gamma$*  (*IFNG*) and *actin  $\alpha$*  (*ACTA1*). As shown in Supplementary Fig. S6 and Supplementary Table S4, there was no specific increase in NGS reads around the TSS ( $\pm 0.5$  kb) of these genes in the enChIP-Seq (NaB) samples. Thus, the interaction between the 5'HS5 locus and those *globin* genes in the differentiated state, could be detected by enChIP-Seq, although we cannot distinguish which genes (i.e., *HBG1* and *HBG2*) mainly interact with the 5'HS5 locus at this stage.

Although the results of 3C showed that the 5'HS5 locus interacts with *HBG1* and *HBG2* even in cells in the undifferentiated state (Dostie *et al.* 2006; Chien *et al.* 2011), these interactions were not clearly observed in enChIP-Seq analysis (Fig. 7). One possibility is that 3C-derived methods

are much more sensitive than enChIP-Seq. Specifically, because 3C-derived methods use PCR amplification to detect ligated regions consisting of different genomic regions, they may be capable of detecting transient or much weaker interactions. In this context, the DNA-looping between 5'HS5 and the *HBG1 / HBG2* region might be organized more stably after NaB treatment for induction for *HBG1 / HBG2* transcription, resulting in the detection of NGS reads by enChIP-Seq. Alternatively, the fragmentation of chromatin DNA by the sonication step in enChIP-Seq may be too harsh to retain weak chromosomal interactions. By contrast, 3C-derived methods employ restriction digestion, which is much milder than sonication, to fragment chromatin DNA. In this respect, it was reported that DNA fragmentation by sonication decreases 3C signals (Gavrilov *et al.* 2013). In fact, when sonication was employed for DNA fragmentation, 3C signals between the HS4/5 and  *$\beta$ -globin* loci in mouse liver cells decreased in proportion to sonication time (Gavrilov *et al.* 2013). In addition, INGRID (in-gel replication of interacting DNA segments), another method using sonication to fragment DNA and in-gel PCR to detect chromosomal interactions, could not detect the interaction between HS5 and  *$\beta$ -globin* loci in mouse liver cells (Gavrilov *et al.* 2014).

### **Dealing with potential aberrant effects of CRISPR complex binding to the target locus**

Binding of the CRISPR complex to target sites might block recruitment of endogenous binding proteins, such as transcription factors, to the sites and physically influence chromosome conformation. To avoid detecting such artificial phenomena, we designed two sgRNAs (#6, #17) at different positions in the locus, both of which did not overlap with the CTCF-binding site or the 5'HS5 core region (Fig. 2). If dCas9 with each sgRNA physically disrupts chromosome conformation around the 5'HS5 locus, we would be unable to extract common peak positions through the filtering steps in Fig. 3. However, we were able to extract several peak positions

(Step 5 in Fig. 3 and Table 2). In addition, we succeeded in detecting a chromosomal interaction between the 5'HS5 locus and *HBG1* and *HBG2* genes (Fig. 7). Thus, it seems unlikely that locus targeting with sgRNA#6 and #17 significantly affects physical chromosome interactions around the locus. Alternatively, although locus targeting might partially induce unexpected physical side-effects on chromosome conformation, enChIP-Seq detected chromosomal interactions that were not disrupted. In this regard, enChIP-Seq failed to detect the DNA looping between two CTCF binding sites of 5'HS5 and 3'HS1 (Supplementary Fig. S4). Therefore, the CRISPR complex may negatively affect chromatin conformation and the binding of proteins to DNA. The failure to detect DNA looping between 5'HS5 and 3'HS1 could be due to disruption of loop formation by the CRISPR complex. Alternatively, enChIP might not isolate sufficient amounts of the CTCF-binding site, which is 0.5 kb upstream from sgRNA target sites. It is not surprising that the yields of enChIP decreased as the distance from the sgRNA target site increased. In this context, the loci identified by enChIP-Seq (e.g., *ZNF670*, *HBG1/HBG2*) might bind to genomic regions much closer to the sgRNA target sites and allow better detection of DNA-looping.

### **Managing potential contamination of off-target sites**

In this study, we identified physical interactions between genomic regions based on signals detected by enChIP-Seq. dCas9 can bind to multiple sites containing sequences similar to the sgRNA sequence (Kuscu *et al.* 2014; Wu *et al.* 2014). To eliminate potential contamination of our findings by off-target sites, we propose several strategies:

- (1) Carefully examine the sequences of the detected peaks and remove those containing sequences similar to the target sequence.
- (2) Use different conditions or cell types. Signals specifically detected in one condition or cell type should reflect true physical interactions between genomic regions.

(3) Use multiple different sgRNAs. Because different sgRNA are unlikely to engage in off-target binding at the same genomic regions, signals observed in common using different sgRNAs should reflect true physical interactions between genomic regions. This approach can also help exclude the possibility that CRISPR complex binding to a target site influences physically the intrinsic chromosome conformations around the site. In addition, cells expressing dCas9 without sgRNA should be used as a negative control to eliminate off-target sites associated with dCas9 in the absence of sgRNA. In this respect, cells expressing dCas9 and with sgRNA targeting irrelevant loci could also be used as the negative controls.

(4) Use a sequential purification scheme. Cas9 orthologs derived from different bacterial species recognize distinct proto-spacer adjacent motif (PAM) sequences and can be used for genome editing and gene regulation (Esvelt *et al.* 2013). Tagging of a given locus with dCas9s derived from different lineages and bearing distinct tags would make it feasible to sequentially purify the locus, minimizing contamination with off-target sites. Using these techniques, we believe that we can effectively manage potential contamination of dCas9 off-target sites in enChIP analyses.

In this study, we used enChIP-Seq analysis to detect physical interactions between genomic regions. In K562-derived cells, the 5'HS5 locus physically interacted with multiple regions in the genome (Fig. 4, Table 2). These interactions were induced by erythroid differentiation in response to NaB treatment (Fig. 4, Table 2). Transcription of genes around the interacting genomic region was up-regulated in the differentiated state (Fig. 6), suggesting a direct or indirect involvement of 5'HS enhancer activity in transcription of genes proximal to the interacting sites. In addition, we succeeded in detecting a chromosomal interaction between the 5'HS5 locus and *globin* genes at the  *$\beta$ -globin* locus using enChIP-Seq (Fig. 7). Our results suggest that enChIP-Seq represents a potentially useful tool for performing non-biased searches for physical

interactions between genomic regions, which would facilitate elucidation of the molecular mechanisms underlying regulation of genome functions. Recently, potential discrepancies were reported between the results of 3C or its derivatives and those of FISH (Williamson *et al.* 2014). This highlights the importance of confirming chromosomal interactions by independent methods. enChIP-Seq could be one such method.

## Experimental procedures

### Design of sgRNAs

All the potential target sites containing the PAM sequence (37 sequences) were obtained from ca. 0.4 kb downstream of the 5'HS5 core site and potential off-target sites were searched for using the GGGenome webtool (<http://gggenome.dbcls.jp>). Two sequences (#6 and #17) showing the highest specificity were selected to generate sgRNAs.

### Plasmids

3xFLAG-dCas9/pMXs-puro (Addgene #51240) was described previously (Fujita & Fujii 2014b).

To construct vectors for expression of sgRNAs, two oligos for each sgRNA were annealed and extended using Phusion polymerase (New England Biolabs) to make 100 bp double-stranded DNA fragments, as described previously (Fujita & Fujii 2013). The nucleotide sequences were as follows: hHS5 #6,

5'-TTTCTTGGCTTTATATATCTTGTGGAAAGGACGAAACACCGGATTCATAGCAGACA  
GCTA-3' and

5'-GACTAGCCTTATTTTAACTTGCTATTTCTAGCTCTAAAACCTAGCTGTCTGCTATGAA  
TCC-3'; hHS5 #17,

5'-TTTCTTGGCTTTATATATCTTGTGGAAAGGACGAAACACCGGGAAGATAGGGTAA  
GAGAC-3' and

5'-GACTAGCCTTATTTTAACTTGCTATTTCTAGCTCTAAAACGTCTCTTACCCTATCTT  
CCC-3'. Fragments were purified following agarose gel electrophoresis and subjected to Gibson

assembly (New England Biolabs) with the linearized sgRNA cloning vector (Addgene #41824), a gift from George Church (Mali *et al.* 2013), to yield sgRNA-hHS5 #6 and sgRNA-hHS5 #17.



The gBlocks were excised with *Xho* I and *Hind* III and cloned into the *Xho* I/*Hind* III-cleaved pSIR vector to generate self-inactivating retroviral vectors for sgRNAs, as described previously (Fujita & Fujii 2014b).

### **Cell culture**

K562-derived cells (Fujita & Fujii 2014b) were maintained in RPMI (Wako) supplemented with 10% fetal calf serum (FCS).

### **Establishment of cells stably expressing 3xFLAG-dCas9 and sgRNA**

The establishment of K562-derived cells expressing 3xFLAG-dCas9 was described previously (Fujita & Fujii 2014b). To establish cells expressing both 3xFLAG-dCas9 and sgRNAs targeting the 5'HS5 locus, 2 µg sgRNA-hHS5 #6/pSIR or sgRNA-hHS5 #17/pSIR was transfected along with 2 µg pPAM3 into  $1 \times 10^6$  293T cells (Miller & Buttimore 1986). Two days after transfection, K562-derived cells expressing 3xFLAG-dCas9 were infected with the supernatant (5 ml) of 293T cells containing the virus particles. K562-derived cells expressing both 3xFLAG-dCas9 and sgRNA-hHS5 #6 or sgRNA-hHS5 #17 were selected in RPMI medium containing 10% FCS, puromycin (0.5 µg/ml), and G418 (0.8 mg/ml).

### **Induction of differentiation of K562-derived cells**

To induce erythroid differentiation of the K562-derived cells, cells were incubated in the presence of 1 mM sodium butyrate (NaB) for 4 days.

### **enChIP-real-time PCR**

enChIP-real-time PCR was performed as previously described (Fujita & Fujii 2013), except that CHIP DNA Clean & Concentrator (Zymo Research) was used for the purification of DNA.

Primers used in the analysis are shown in Supplementary Table S5.

### **enChIP-Seq and bioinformatics analysis**

Undifferentiated or differentiated K562-derived cells ( $2 \times 10^7$  each) expressing 3xFLAG-dCas9 and sgRNAs were subjected to the enChIP procedure as described previously (Fujita & Fujii 2013), except that CHIP DNA Clean & Concentrator was used for the purification of DNA. NGS and data analysis were performed at the University of Tokyo, as described previously (Yamashita *et al.* 2011; Seki *et al.* 2014). Briefly, after fragmentation of chromatin DNA (average fragment length, 2 kbp), the 5'HS5 region was isolated by enChIP. After DNA purification, the enChIP-Seq libraries were purified using TruSeq ChIP Sample Prep Kit (Illumina), which resulted in the selective concentration of DNA fragments with an average size of ~0.4 kbp. The libraries were subjected to DNA sequencing using the HiSeq platform according to the manufacturer's protocol. enChIP-Seq data were mapped to the human reference genome hg19 using ELAND (Illumina). Each enChIP-Seq experiment was performed once. Narrow peaks of each enChIP-Seq dataset were detected using MACS2 using the default parameters. Additional information on enChIP-Seq analysis is provided in Supplementary Table S6. Further data analysis for Step 2 in Fig. 3 was performed at Hokkaido System Science Co., Ltd. Images of NGS peaks were generated using the UCSC Genome Browser (<https://genome.ucsc.edu/index.html>). The accession number of the enChIP-Seq data is DRA004361 (<http://www.ncbi.nlm.nih.gov/sra/?term=DRA004361>).

### **Detection of DNA-DNA interactions to confirm interactions between genomic regions**

K562 cells ( $1 \times 10^7$ ) were fixed with 1% formaldehyde at 37°C for 5 min. The chromatin fraction was extracted and fragmented by sonication (average fragment length, 2 kbp), as described previously (Fujita *et al.* 2007), except that TE buffer (800  $\mu$ l; 10 mM Tris pH 8.0, 1 mM EDTA) and a UD-201 ultrasonic disruptor (TOMY SEIKO) were used. Sonicated chromatin (34  $\mu$ l) was treated with the End-It DNA End-Repair kit (Epicentre) in a 50  $\mu$ l reaction mixture at room temperature for 45 min. After heating at 70°C for 10 min, the reaction mixture (23.5  $\mu$ l) was incubated in the presence or absence of T4 DNA ligase (Roche) at room temperature for 2 h. After reverse crosslinking at 65°C and RNase A and Proteinase K treatment, DNA was purified using ChIP DNA Clean & Concentrator. The purified DNA was used as a template for the first PCR with KOD FX (Toyobo) and a primer set including a primer containing the *I-Sce I* site biotinylated at its 5' end (Supplementary Table S5). PCR conditions were as follows: denaturing at 94°C for 2 min; 40 cycles of 98°C for 10 sec, 60°C for 30 sec, and 68°C for 6 min. The reaction mixture (15  $\mu$ l) was mixed with 15  $\mu$ l of Dynabeads M-280 Streptavidin (Thermo Fisher Scientific) and 500  $\mu$ l of RIPA buffer (50 mM Tris [pH 7.5], 150 mM NaCl, 1 mM EDTA, 0.5% sodium deoxycholate, 0.1% SDS, 1% IGEPAL-CA630) at 4°C for 1 h. After three washes with RIPA buffer and one wash with 1 $\times$  NEBuffer 2 (New England Biolabs), the Dynabeads were treated with *I-Sce I* at 37°C for 2 h. The supernatant was collected, incubated at 65°C for 20 min, and used for the second PCR with AmpliTaq Gold 360 Master Mix (Applied Biosystems). PCR conditions were as follows: denaturing at 95°C for 10 min; 27 cycles of 95°C for 30 sec, 60°C for 30 sec, and 72°C for 1 min. Primers used in the analysis are shown in Supplementary Table S5. All the amplicons were sequenced to confirm that they were the expected PCR products.

### **RNA extraction and quantitative RT-PCR**

Total RNA was extracted from mock- or NaB-treated K562 cells and used for quantitative RT-PCR, as previously described (Fujita & Fujii 2012b). Primers used in the analysis are shown in Supplementary Table S5.

## **Acknowledgements**

We thank G.M. Church for providing a plasmid (Addgene plasmid #41824), F. Kitaura for technical assistance, and T. Kikuchi, H. Horiuchi, and M. Tosaka for NGS analysis.

## **Funding**

This work was supported by the Asahi Glass Foundation (H.F.), the Uehara Memorial Foundation (H.F.), the Kurata Memorial Hitachi Science and Technology Foundation (T.F. and H.F.), Grant-in-Aid for Young Scientists (B) (#25830131) (T.F.), Grant-in-Aid for Scientific Research (C) (#15K06895) (T.F.), Grant-in-Aid for Scientific Research (B) (#15H04329) (T.F., H.F.), Grant-in-Aid for Scientific Research on Innovative Areas "Cell Fate" (#23118516) (T.F.), "Transcription Cycle" (#25118512 and #15H01354) (H.F.), "Genome Science" (#221S0002) (H.F.), and a Grant-in-Aid for Exploratory Research (#26650059) (H.F.) from the Ministry of Education, Culture, Sports, Science and Technology of Japan.

## **Abbreviations**

enChIP, engineered DNA-binding molecule-mediated chromatin immunoprecipitation; NGS, next generation sequencing; enChIP-Seq, enChIP combined with NGS; CRISPR, clustered regularly interspaced short palindromic repeats; dCas9, a catalytically inactive form of Cas9; sgRNA, single guide RNA; FISH, fluorescence *in situ* hybridization; 3C, chromosome conformation capture; iChIP, insertional ChIP; DB, DNA-binding molecule or complex; TAL, transcription activator-like; NLS, nuclear localization signal; MS, mass spectrometry; NaB, sodium butyrate.

**Conflicts of interest**

T.F. and H.F. have filed a patent application for enChIP (Patent name: “Method for isolating specific genomic regions using DNA-binding molecules recognizing endogenous DNA sequences”; Patent number: WO2014/125668). T.F. and H.F. are founders of Epigeneron, LLC.

## References

- Bogdanove, A.J. & Voytas, D.F. (2011) TAL effectors: customizable proteins for DNA targeting. *Science* **333**, 1843-1846.
- Caterina, J.J., Ryan, T.M., Pawlik, K.M., Palmiter, R.D., Brinster, R.L., Behringer, R.R. & Townes, T.M. (1991) Human beta-globin locus control region: analysis of the 5' DNase I hypersensitive site HS 2 in transgenic mice. *Proc. Natl. Acad. Sci. U. S. A.* **88**, 1626-1630.
- Cencic, R., Miura, H., Malina, A., Robert, F., Ethier, S., Schmeing, T.M., Dosite, J. & Pelletier, J. (2014) Protospacer adjacent motif (PAM)-distal sequences engage CRISPR Cas9 DNA target cleavage. *PLoS One* **9**, e109213.
- Chien, R., Zeng, W., Kawauchi, S., Bender, M.A., Santos, R., Gregson, H.C., Schmiesing, J.A., Newkirk, D.A., Kong, X., Ball, A.R.J., Calof, A.L., Lander, A.D., Groudine, M.T. & Yokomori, K. (2011) Cohesin mediates chromatin interactions that regulate mammalian  $\beta$ -globin expression. *J. Biol. Chem.* **286**, 17870-17878.
- de Wit, E. & de Laat, W. (2012) A decade of 3C technologies: insights into nuclear organization. *Genes Dev.* **26**, 11-24.
- Dekker, J., Rippe, K., Dekker, M. & Kleckner, N. (2002) Capturing chromosome conformation. *Science* **295**, 1306-1311.
- Deng, B., Melnik, S. & Cook, P.R. (2013) Transcription factories, chromatin loops, and the dysregulation of gene expression in malignancy. *Semin. Cancer Biol.* **23**, 65-71.
- Dostie, J., Richmond, T.A., Arnaout, R.A., Selzer, R.R., Lee, W.L., Honan, T.A., Rubio, E.D., Krumm, A., Lamb, J., Nusbaum, C., Green, R.D. & Dekker, J. (2006) Chromosome Conformation Capture Carbon Copy (5C): a massively parallel solution for mapping interactions between genomic elements. *Genome Res* **16**, 1299-1309.

Esvelt, K.M., Mali, P., Braff, J.L., Moosburner, M., Yaung, S.J. & Church, G.M. (2013) Orthogonal Cas9 proteins for RNA-guided gene regulation and editing. *Nat. Methods* **10**, 1116-1121.

Farrell, C.M., West, A.G. & Felsenfeld, G. (2002) Conserved CTCF insulator elements flank the mouse and human beta-globin loci. *Mol. Cell. Biol* **22**, 3820-3831.

Fraser, P. & Bickmore, W. (2007) Nuclear organization of the genome and the potential for gene regulation. *Nature* **447**, 413-417.

Fujii, H. & Fujita, T. (2015) Isolation of specific genomic regions and identification of their associated molecules by engineered DNA-binding molecule-mediated chromatin immunoprecipitation (enChIP) using the CRISPR system and TAL proteins. *Int. J. Mol. Sci.* **16**, 21802-21812.

Fujita, T., Asano, Y., Ohtsuka, J., Takada, Y., Saito, K., Ohki, R. & Fujii, H. (2013) Identification of telomere-associated molecules by engineered DNA-binding molecule-mediated chromatin immunoprecipitation (enChIP). *Sci. Rep.* **3**, 3171.

Fujita, T. & Fujii, H. (2011) Direct identification of insulator components by insertional chromatin immunoprecipitation. *PLoS One* **6**, e26109.

Fujita, T. & Fujii, H. (2012a) Efficient isolation of specific genomic regions by insertional chromatin immunoprecipitation (iChIP) with a second-generation tagged LexA DNA-binding domain. *Adv. Biosci. Biotechnol.* **3**, 626-629.

Fujita, T. & Fujii, H. (2012b) Transcription start sites and usage of the first exon of mouse Foxp3 gene. *Mol. Biol. Rep.* **39**, 9613-9619.

Fujita, T. & Fujii, H. (2013) Efficient isolation of specific genomic regions and identification of associated proteins by engineered DNA-binding molecule-mediated chromatin immunoprecipitation (enChIP) using CRISPR. *Biochem. Biophys. Res. Commun.* **439**, 132-136.



Fujita, T. & Fujii, H. (2014a) Efficient isolation of specific genomic regions retaining molecular interactions by the iChIP system using recombinant exogenous DNA-binding proteins. *BMC Mol. Biol.* **15**, 26.

Fujita, T. & Fujii, H. (2014b) Identification of proteins associated with an IFN $\gamma$ -responsive promoter by a retroviral expression system for enChIP using CRISPR. *PLoS One* **9**, e103084.

Fujita, T. & Fujii, H. (2015) Applications of engineered DNA-binding molecules such as TAL proteins and the CRISPR/Cas system in biology research. *Int. J. Mol. Sci.* **16**, 23143-23164.

Fujita, T. & Fujii, H. (2016) Biochemical analysis of genome functions using locus-specific chromatin immunoprecipitation technologies. *Gene Regul Syst Bio Suppl.* **1**, 1-9.

Fujita, T., Kitaura, F. & Fujii, H. (2015a) A critical role of the Thy28-MYH9 axis in B cell-specific expression of the *Pax5* gene in chicken B cells. *PLoS One* **10**, e0116579.

Fujita, T., Ryser, S., Tortola, S., Piuz, I. & Schlegel, W. (2007) Gene-specific recruitment of positive and negative elongation factors during stimulated transcription of the MKP-1 gene in neuroendocrine cells. *Nucleic Acids Res.* **35**, 1007-1017.

Fujita, T., Yuno, M. & Fujii, H. (2016a) Allele-specific locus binding and genome editing by CRISPR at the p16INK4a locus. *Sci. Rep.* **6**, 30485.

Fujita, T., Yuno, M. & Fujii, H. (2016b) Efficient sequence-specific isolation of DNA fragments and chromatin by in vitro enChIP technology using recombinant CRISPR ribonucleoproteins. *Genes Cells* **21**, 370-377.

Fujita, T., Yuno, M., Okuzaki, D., Ohki, R. & Fujii, H. (2015b) Identification of non-coding RNAs associated with telomeres using a combination of enChIP and RNA sequencing. *PLoS One* **10**, e0123387.

Gavrilov, A.A., Chetverina, H.V., Chermnykh, E.S., Razin, S.V. & Chetverin, A.B. (2014) Quantitative analysis of genomic element interactions by molecular colony technique. *Nucleic Acids Res.* **42**, e36.

Gavrilov, A.A., Gushchanskaya, E.S., Strelkova, O., Zhironkina, O., Kireev, I.I., Iarovaia, O.V. & Razin, S.V. (2013) Disclosure of a structural milieu for the proximity ligation reveals the elusive nature of an active chromatin hub. *Nucleic Acids Res.* **41**, 3563-3575.

Ghirlando, R., Giles, K., Gowher, H., Xiao, T., Xu, Z., Yao, H. & Felsenfeld, G. (2012) Chromatin domains, insulators, and the regulation of gene expression. *Biochim. Biophys. Acta* **1819**.

Holwerda, S.J. & de Laat, W. (2013) CTCF: the protein, the binding partners, the binding sites and their chromatin loops. *Philos. Trans. R. Soc. Lond. B. Biol. Sci.* **368**, 20120369.

Hoshino, A. & Fujii, H. (2009) Insertional chromatin immunoprecipitation: a method for isolating specific genomic regions. *J. Biosci. Bioeng.* **108**, 446-449.

Kalhor, R., Tjong, H., Jayathilaka, N., Alber, F. & Chen, L. (2011) Genome architectures revealed by tethered chromosome conformation capture and population-based modeling. *Nat Biotechnol.* **30**, 90-98.

Kuscu, C., Arslan, S., Singh, R., Thorpe, J. & Adli, M. (2014) Genome-wide analysis reveals characteristics of off-target sites bound by the Cas9 endonuclease. *Nat Biotechnol.* **32**, 677-683.

Mali, P., Yang, L., Esvelt, K.M., Aach, J., Guell, M., DiCarlo, J.E., Norville, J.E. & Church, G.M. (2013) RNA-guided human genome engineering via Cas9. *Science* **339**, 823-826.

Miller, A.D. & Buttimore, C. (1986) Redesign of retrovirus packaging cell lines to avoid recombination leading to helper virus production. *Mol Cell Biol.* **6**, 2895-2902.

Nagano, T., Várnai, C., Schoenfelder, S., Javierre, B.M., Wingett, S.W. & Fraser, P. (2015) Comparison of Hi-C results using in-solution versus in-nucleus ligation. *Genome Biol.* **16**, 175.

- Navas, P.A., Peterson, K.R., Li, Q., McArthur, M. & Stamatoyannopoulos, G. (2001) The 5'HS4 core element of the human beta-globin locus control region is required for high-level globin gene expression in definitive but not in primitive erythropoiesis. *J. Mol. Biol.* **312**, 17-26.
- O'Green, H., Henry, I.M., Bhakta, M.S., Meckler, J.F. & Segal, D.J. (2015) A genome-wide analysis of Cas9 binding specificity using CHIP-seq and targeted sequence capture. *Nucleic Acids Res.* **43**, 3389-3404.
- Pabo, C.O., Peisach, E. & Grant, R.A. (2001) Design and selection of novel Cys2his2 zinc finger proteins. *Annu. Rev. Biochem.* **70**, 313-340.
- Peterson, K.R., Clegg, C.H., Navas, P.A., Norton, E.J., Kimbrough, T.G. & Stamatoyannopoulos, G. (1996) Effect of deletion of 5'HS3 or 5'HS2 of the human beta-globin locus control region on the developmental regulation of globin gene expression in beta-globin locus yeast artificial chromosome transgenic mice. *Proc. Natl. Acad. Sci. U. S. A.* **93**, 6605-6609.
- Qi, L.S., Larson, M.H., Gilbert, L.A., Doudna, J.A., Weissman, J.S., Arkin, A.P. & Lim, W.A. (2013) Repurposing CRISPR as an RNA-guided platform for sequence-specific control of gene expression. *Cell* **152**, 1173-1183.
- Seki, M., Masaki, H., Arauchi, T., Makauchi, H., Sugano, S. & Suzuki, Y. (2014) A comparison of the Rest complex binding patterns in embryonic stem cells and epiblast stem cells. *PLoS One* **9**, e95374.
- Williams, A., Spilianakis, C.G. & Flavell, R.A. (2010) Interchromosomal association and gene regulation in trans. *Trends Genet.* **26**, 188-197.
- Williamson, I., Berlivet, S., Eskeland, R., Boyle, S., Illingworth, R.S., Paquette, D., Dostie, J. & Bickmore, W.A. (2014) Spatial genome organization: contrasting views from chromosome conformation capture and fluorescence in situ hybridization. *Genes Dev.* **28**, 2778-2791.

Wu, X., Scott, D.A., Kriz, A.J., Chiu, A.C., Hsu, P.D., Dadon, D.B., Cheng, A.W., Trevino, A.E., Konermann, S., Chen, S., Jaenisch, R., Zhang, F. & Sharp, P.A. (2014) Genome-wide binding of the CRISPR endonuclease Cas9 in mammalian cells. *Nat. Biotechnol.* **32**, 670-676.

Yamashita, R., Sathira, N.P., Kanai, A., Tanimoto, K., Arauchi, T., Tanaka, Y., Hashimoto, S., Sugano, S., Nakai, K. & Suzuki, Y. (2011) Genome-wide characterization of transcriptional start sites in humans by integrative transcriptome analysis. *Genome Res* **21**, 775-789.

## Figure legends

**Fig. 1. Schematic of the use of enChIP-Seq analysis to identify physical interactions between genomic regions.** (i) The CRISPR system for locus tagging. It consists of 3xFLAG-dCas9 (a fusion protein of the 3xFLAG-tag, dCas9, and a nuclear localization signal [NLS]) and a single guide RNA (sgRNA) targeting the locus of interest. (ii) 3xFLAG-dCas9 and the sgRNA are expressed for locus tagging in the cells to be analyzed. (iii) The cells are crosslinked, if necessary, and lysed. Chromatin is purified and fragmented by sonication or other methods. (iv) Complexes containing the CRISPR complex are immunoprecipitated with anti-FLAG Ab. (v) After reversal of crosslinking, if necessary, DNA is purified and subjected to the NGS analysis to identify interacting genomic regions (blue line). In this scheme, the CRISPR system is shown as a representative. Other engineered DNA-binding molecules including ZF and TAL proteins are also suitable for use in enChIP-Seq.

**Fig. 2. Isolation of the 5'HS5 locus by enChIP.** (A) Schematic depiction of the  $\beta$ -globin locus. The positions of the 5'HS and 3'HS1 loci and the *globin* genes are indicated. (B) Positions of sgRNA target sites. Purple, CTCF-binding site (Farrell *et al.* 2002); red, 5'HS5 core region (NCBI Reference Sequence: NG\_000007.3); green, sgRNA target site (5'HS5 #6); blue, sgRNA target site (5'HS5 #17); italic and underline, primer positions used in enChIP-real-time PCR in (c). (C) Yields of enChIP for the 5'HS5 locus. (D and E) NGS peaks at the target 5'HS5 locus (D) and the irrelevant *SOX2* locus (E). Raw ChIP-Seq read data were displayed as density plots in the UCSC Genome Browser. The vertical viewing range (y-axis shown as Scale) was set at 1-300 based on the magnitude of the noise peaks. Black vertical bars show locus positions in the human

genome (hg19 assembly). The position of the *SOX2* gene is shown under the plot (E). (-), mock-treated; NaB, treated with sodium butyrate.

**Fig. 3. Filtering of the NGS peaks to identify genomic regions that interact with the 5'HS5 locus in the differentiated state. (Step 1)** Extraction of enChIP-specific NGS peaks by comparison with enChIP and input peaks detected in the differentiated state, using Model-based Analysis of ChIP-Seq (MACS) (<http://liulab.dfci.harvard.edu/MACS/>). The extracted enChIP-specific peaks include NaB-specific and constitutively detected peaks. **(Step 2)** Elimination of peaks derived from non-specific binding of dCas9. After the elimination step, peaks fulfilling the defined criteria (19 for sgRNA #6 and 228 for sgRNA #17) were analyzed in step 3. **(Step 3)** Identification of peaks detected in common by both sgRNA #6 and #17. Genomic regions corresponding to the identified peaks were considered to physically interact with the 5'HS5 locus. **(Step 4)** Extraction of enChIP-specific NGS peaks by comparison with enChIP and input peaks detected in the undifferentiated state, using MACS. The extracted enChIP-specific peaks include peaks specifically detected in undifferentiated cells and constitutively detected peaks. **(Step 5)** Identification of genomic regions that interact with the 5'HS5 locus in an NaB-specific manner.

**Fig. 4. Identification of genomic regions that physically interact with the 5'HS5 locus by enChIP-Seq.** Raw enChIP-Seq read data were displayed as density plots in the UCSC Genome Browser. The vertical viewing range (y-axis shown as Scale) was set at 1-160 based on the noise peaks. Black vertical bars reveal locus positions in the human genome (hg19 assembly). Positions of genes are shown under the plots. (-), mock-treated; NaB, treated with sodium butyrate.

**Fig. 5. Confirmation of enChIP-Seq results by the ligation-mediated assay.** Results of PCR. K562 cells cultured in the presence or absence of NaB were crosslinked, and the chromatin was extracted, fragmented, and subjected to the proximity ligation assay (Supplementary Fig. S2) to confirm interaction between the 5'HS5 and the loci detected by enChIP-Seq. The loci in chromosome 1 (*ZNF670/ZNF670-ZNF695*) (A), chromosome 15 (*MIR422A*) (B), and chromosome 11 (*YIF1A*) (C) were detected by the second PCR. Amplification in the second PCR suggests that 5'HS5 is physically proximal to the loci detected by enChIP-Seq. Two representatives (#1 and #2) of each sample ( $\pm$ NaB treatment) are shown. See also Supplementary Fig. S3.

**Fig. 6. NaB-induced expression of genes in the vicinity of genomic regions that interact with the 5'HS5 locus.** Total RNA was extracted from K562 and used for quantitative RT-PCR analysis. Expression levels of the indicated genes were normalized to those of *GAPDH*, and the levels of mRNA in the absence of NaB were defined as 1 (mean  $\pm$  SD, n = 3). N.D., not detected; \*, t-test p value <0.05; \*\*, t-test p value <0.01.

**Fig. 7. Detection of chromosomal interactions between the 5'HS5 locus and the *globin* genes (*HBG1* and *HBG2*) at the  $\beta$ -*globin* locus by enChIP-Seq.** enChIP-Seq reads corresponding to *HBG1* and *HBG2* genes ( $\pm$  0.5 kb around each TSS, Supplementary Fig. S5) were manually counted and fold enrichment with respect to input reads was analyzed. The data are shown in Supplementary Table S3.

**Table 1.** NGS information regarding the 5'HS5 target locus.

| sgRNA | Condition    | Fold enrichment<br>(compared with input gDNA)* | Number of tags <sup>†</sup> |
|-------|--------------|------------------------------------------------|-----------------------------|
| #6    | minus (mock) | 120                                            | 655                         |
|       | NaB          | 168                                            | 783                         |
| #17   | minus (mock) | 65                                             | 273                         |
|       | NaB          | 122                                            | 217                         |

\*, NGS tag numbers of the target 5'HS5 locus were compared between enChIP-Seq and input genomic DNA samples and fold enrichment relative to input genomic DNA calculated by the MACS2 software is shown.

<sup>†</sup>, NGS tag numbers of the target 5'HS5 locus detected by enChIP-Seq.



**Table 2.** List of peak positions detected in common by both sgRNA #6 and #17.

| sgRNA #6 (NaB) |           |           |               |                   |                              | sgRNA #17 (NaB) |           |           |               |                   |                              |                     |
|----------------|-----------|-----------|---------------|-------------------|------------------------------|-----------------|-----------|-----------|---------------|-------------------|------------------------------|---------------------|
| chr            | start     | end       | length (base) | tags <sup>§</sup> | fold enrichment <sup>†</sup> | chr             | start     | end       | length (base) | tags <sup>§</sup> | fold enrichment <sup>†</sup> | status <sup>‡</sup> |
| chr1           | 247240307 | 247240894 | 588           | 68                | 17.62                        | chr1            | 247240610 | 247240804 | 195           | 18                | 12.84                        | NaB-specific        |
| chr1           | 247240925 | 247241339 | 415           | 49                | 12.95                        | chr1            | 247240971 | 247241324 | 354           | 28                | 10.33                        | NaB-specific        |
| chr7           | 132001863 | 132002364 | 502           | 71                | 27.24                        | chr7            | 132001929 | 132002385 | 457           | 50                | 22.29                        | NaB-specific        |
| chr11          | 66057056  | 66057342  | 287           | 45                | 30.65                        | chr11           | 66057120  | 66057297  | 178           | 13                | 14.48                        | NaB-specific        |
| chr15          | 64162769  | 64163183  | 415           | 51                | 29.06                        | chr15           | 64162762  | 64163061  | 300           | 31                | 27.51                        | NaB-specific        |
| chr11*         | 5311586   | 5312647   | 1062          | 783               | 168.11                       | chr11           | 5311878   | 5312599   | 722           | 217               | 122.27                       | constitutive        |

The peak positions detected in Step 5 in Fig. 3 are shown.

\* , target locus (5'HS5)

§ , the NGS tag numbers of the peak positions detected in enChIP-Seq.

† , the NGS tag numbers of peak positions were compared between enChIP-Seq and input genomic DNA samples and fold enrichment relative to input genomic DNA calculated by the MACS2 software is shown.

‡ , the peak positions were detected constitutively or in an NaB-specific manner by enChIP-Seq.

Figure 1

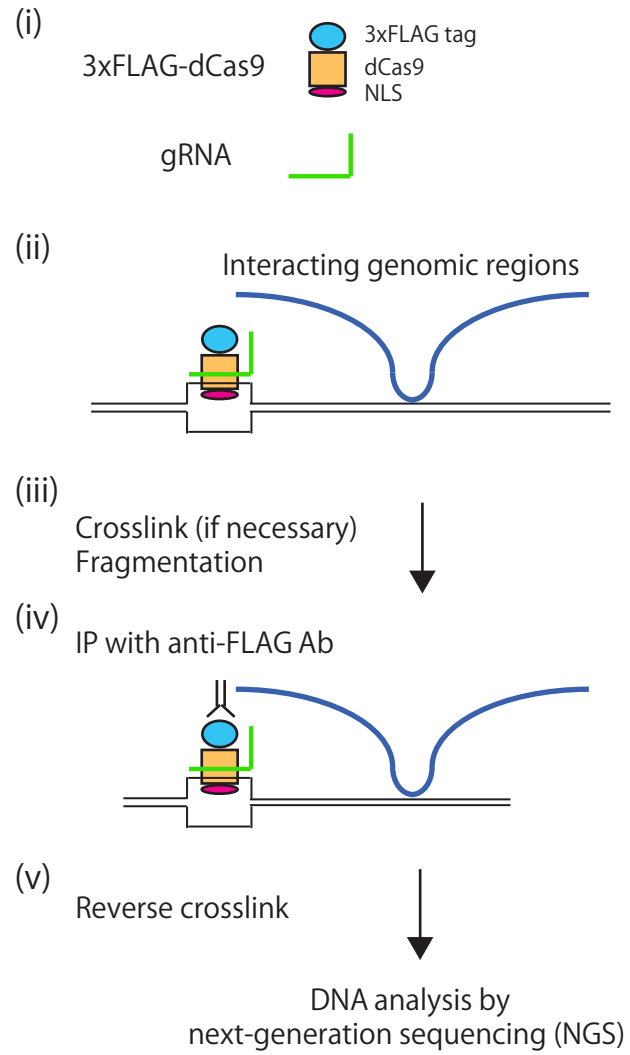

Figure 2

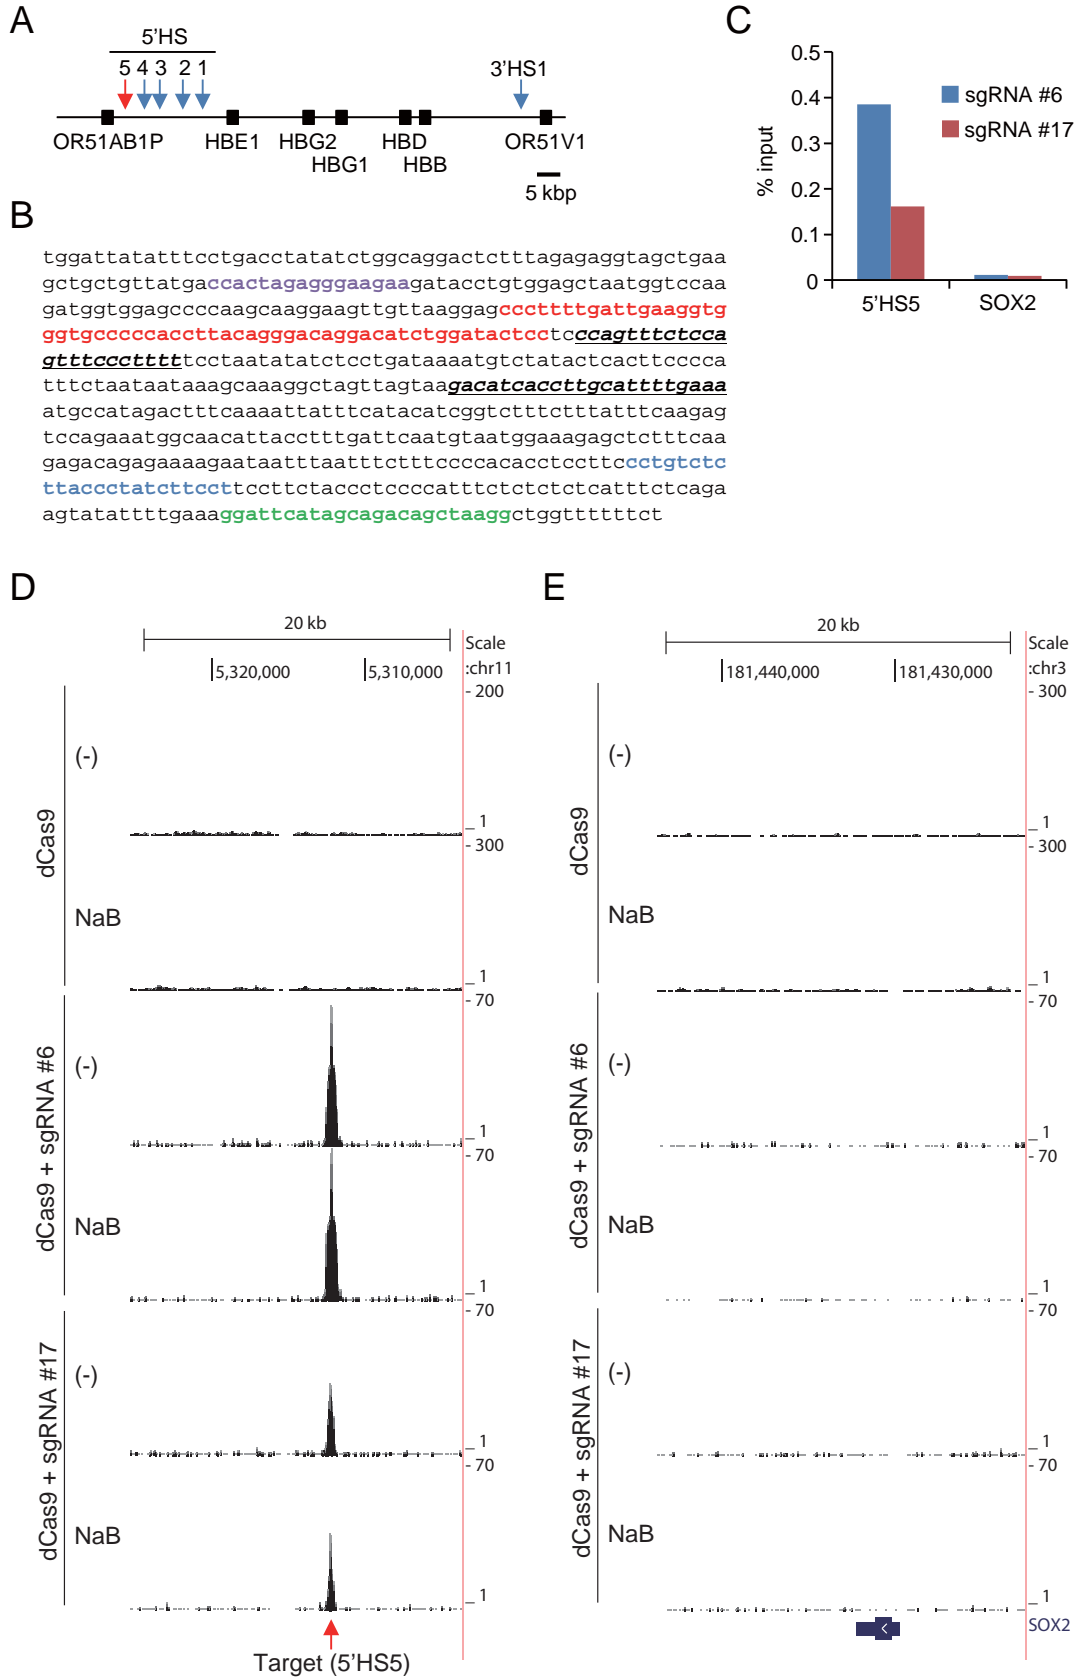

Figure 3

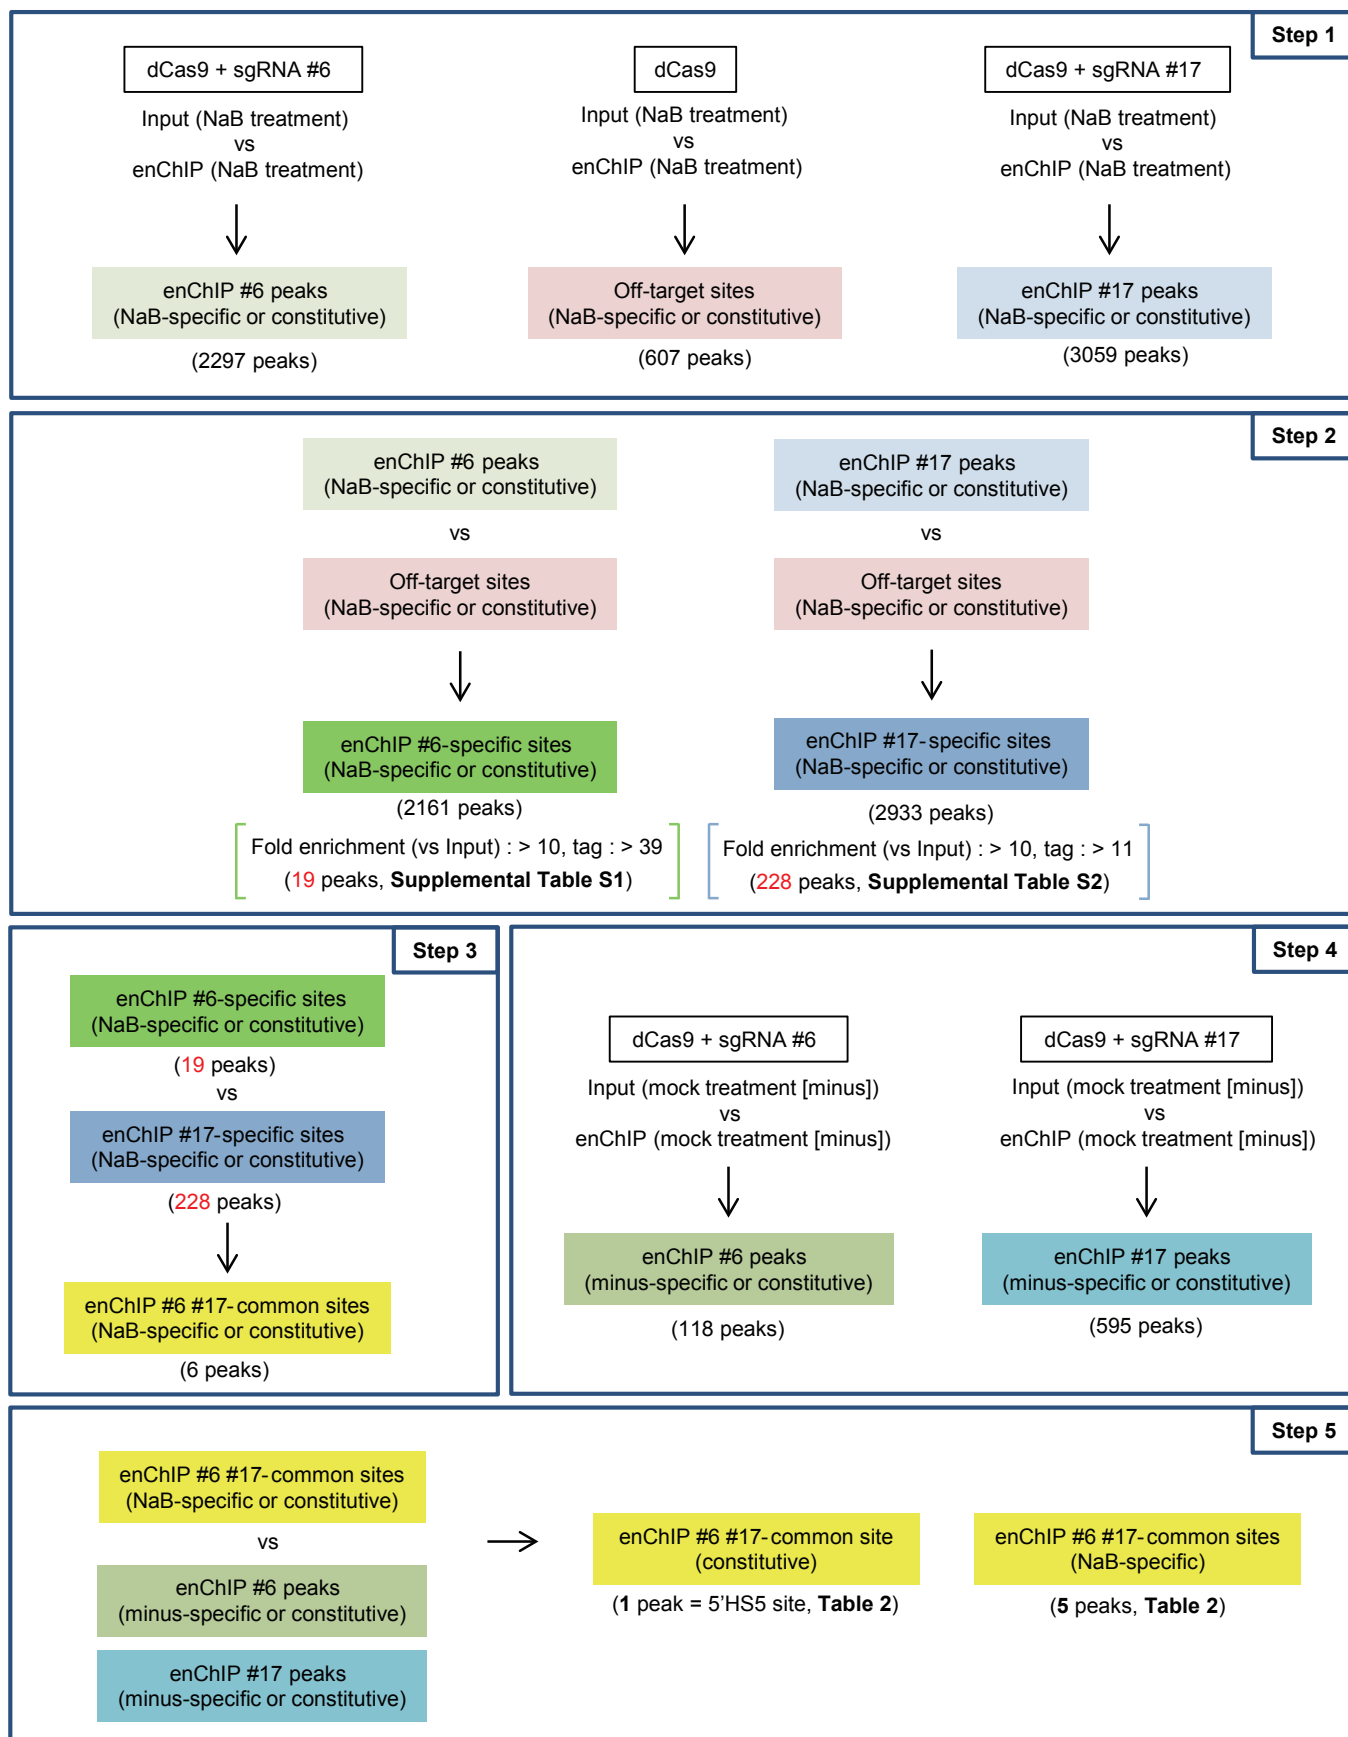

Figure 4

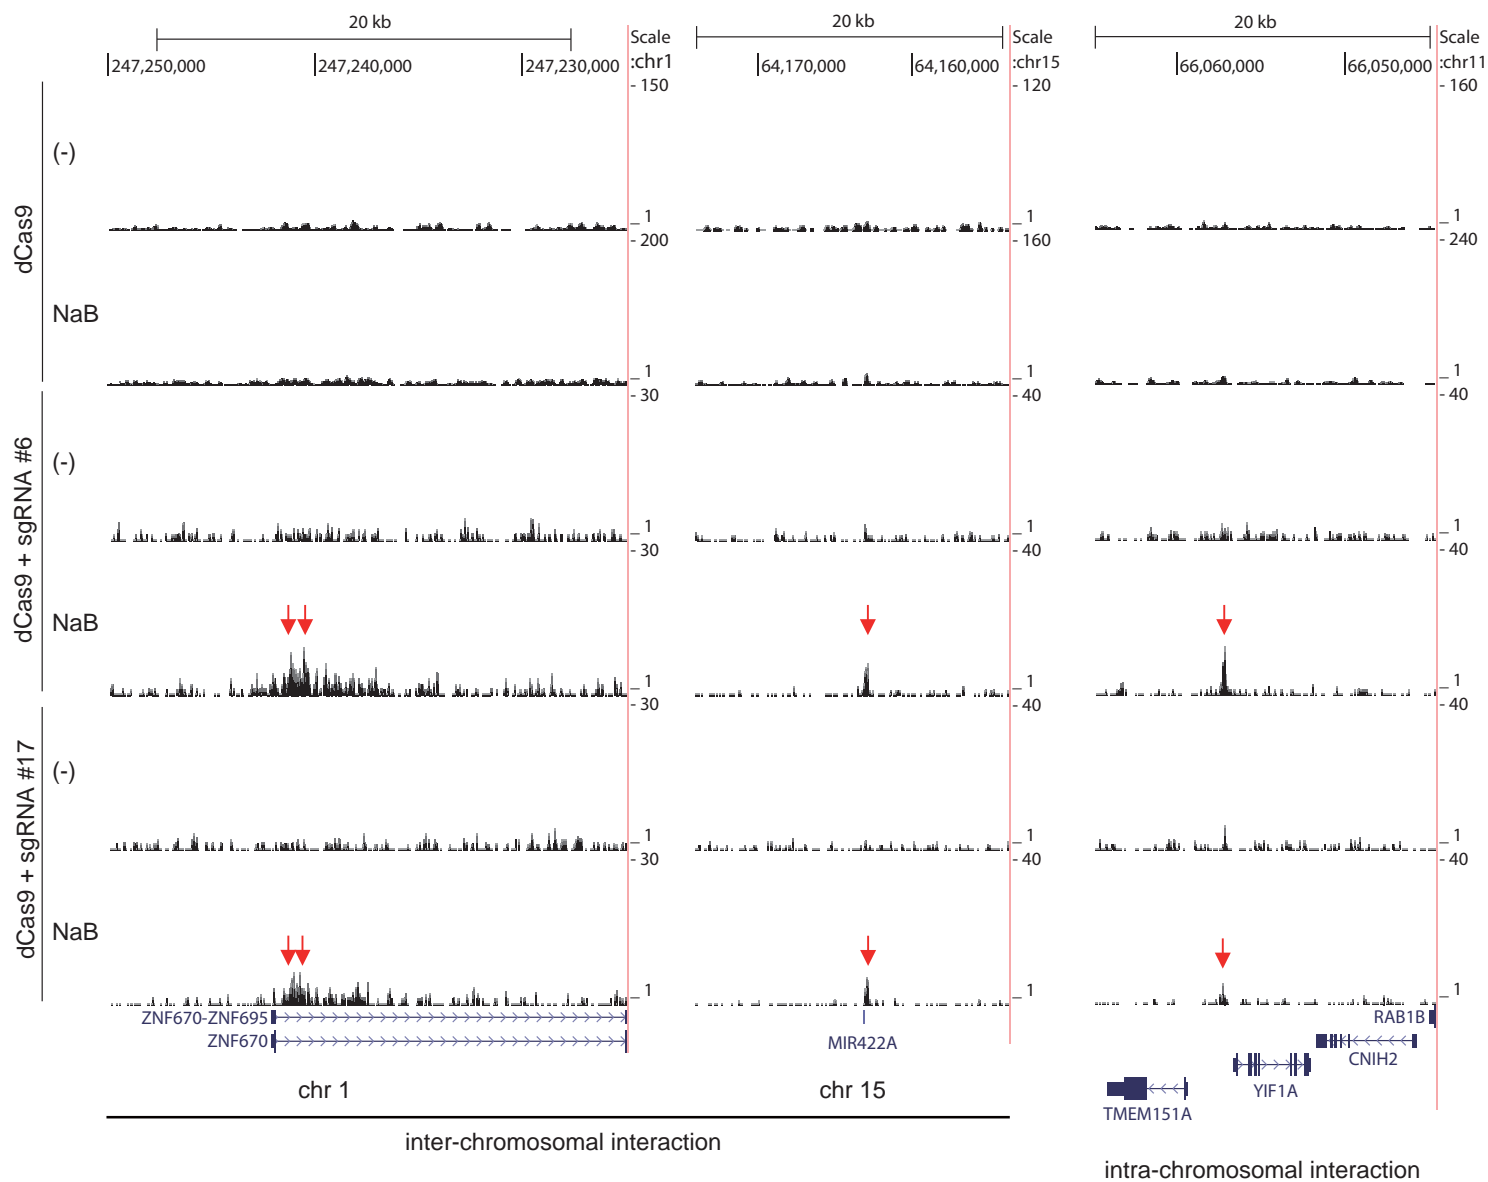

Figure 5

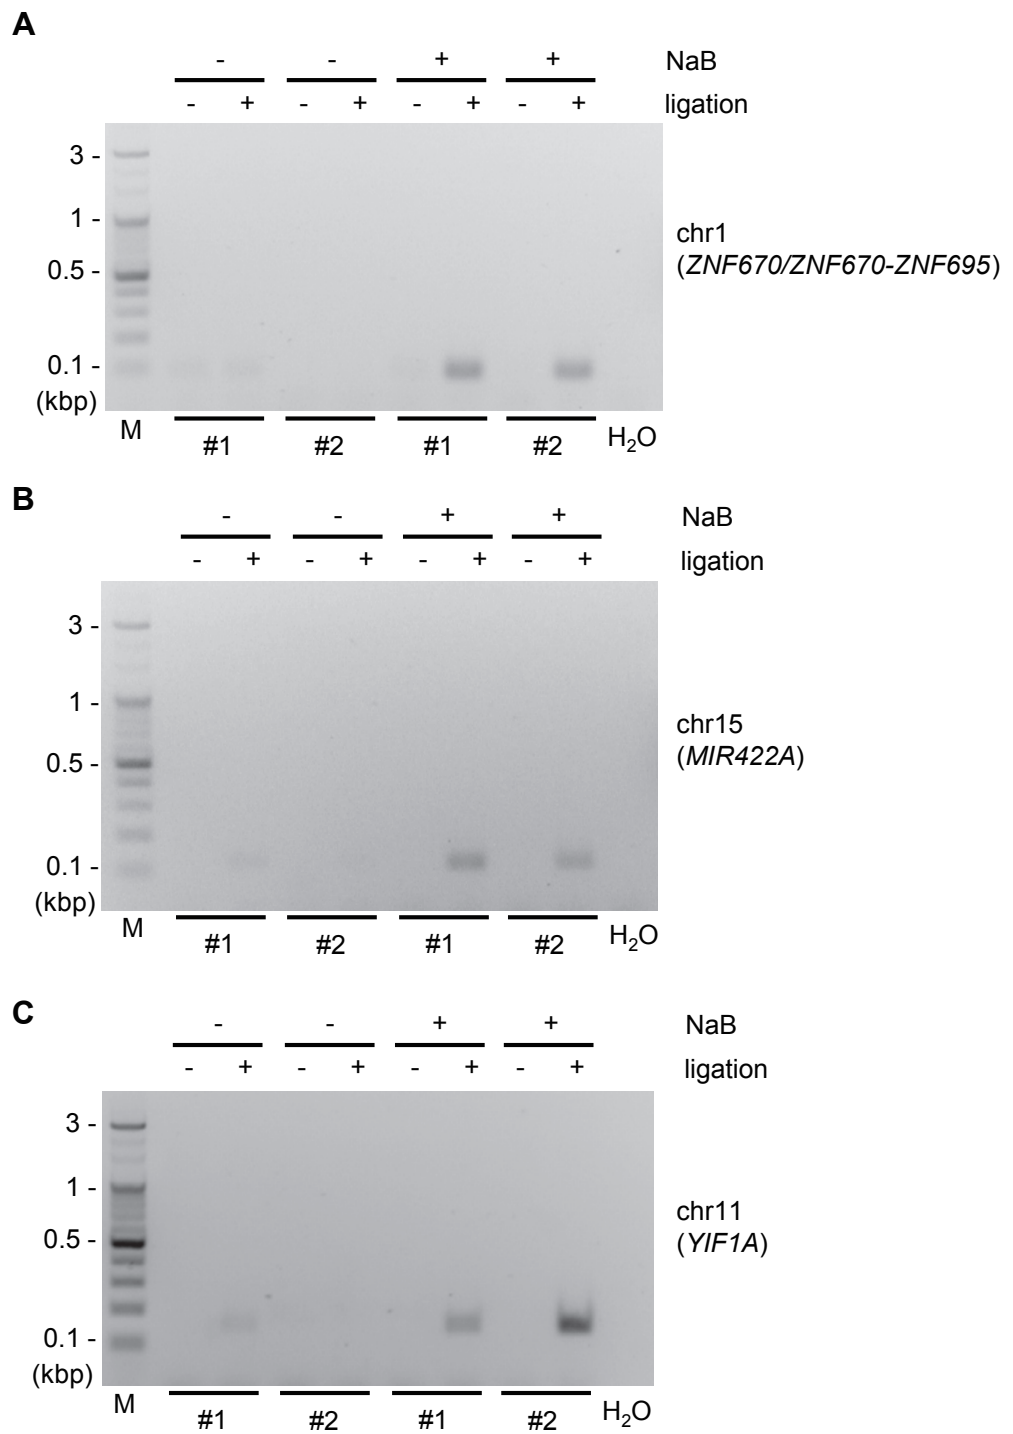

Figure 6

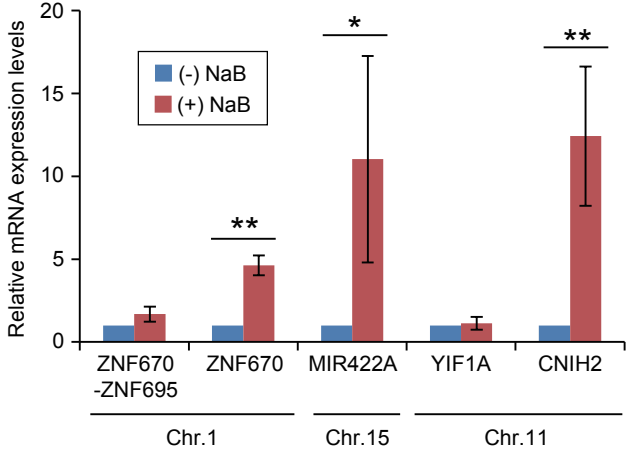

Figure 7

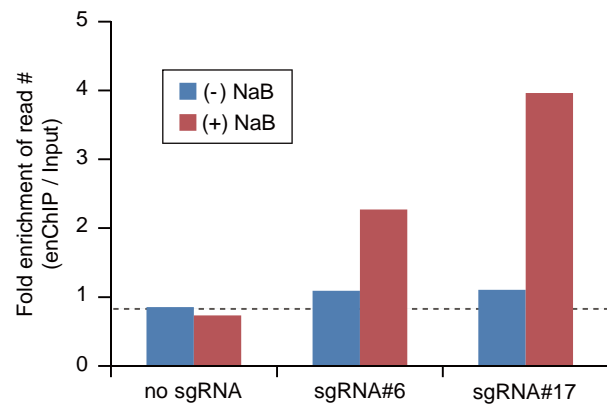



**Supplementary Information**

**Identification of physical interactions between genomic regions by enChIP-Seq**

Toshitsugu Fujita, Miyuki Yuno, Yutaka Suzuki, Sumio Sugano, and Hodaka Fujii

## Supplementary Figure Legends

**Supplementary Fig. S1. Filtering of NGS peaks to identify genomic regions that interact with the 5'HS5 locus in the undifferentiated state. (Step 1)** Extraction of genomic regions that interact with the 5'HS5 locus specifically in the undifferentiated state. After the extraction step, regions fulfilling the defined criteria (one for sgRNA #6 and seven for sgRNA #17) were analyzed in Step 2. **(Step 2)** Identification of peaks detected in common using sgRNA #6 and #17.

**Supplementary Fig. S2. Scheme for Detection of DNA-DNA interactions (D-Cube), a ligation-mediated assay, to confirm interactions between genomic regions.** Cells are crosslinked and lysed, and genomic DNA is randomly fragmented by sonication or other methods. After repair of DNA ends, proximal ligation, and reversal of crosslinking, the junction between the target locus and its potential interacting region is amplified by PCR. If a biotinylated primer is used, the amplicon can be purified using streptavidin. Subsequently, a part of the amplified region in the potential interacting locus is detected by the second PCR. Amplification of the region in the second PCR suggests that the potential interacting locus is physically proximal to the target locus.

**Supplementary Fig. S3. Confirmation of the enChIP-Seq results by the ligation-mediated assay.** The PCR results obtained using the DNA for the first PCR and the locus-specific primer sets used for the second PCR are shown. The loci in chromosome 1 (*ZNF670/ZNF670-ZNF695*) (A), chromosome 15 (*MIR422A*) (B), and chromosome 11 (*YIF1A*) (C) were detected. These results show that the assays were run with comparable amounts of input DNA. Two representatives (#1 and #2) of each sample ( $\pm$ NaB treatment) are shown.

**Supplementary Fig. S4. NGS peak images in the  $\beta$ -globin locus.** Raw ChIP-Seq read data were displayed as density plots in the UCSC Genome Browser. The vertical viewing range (y-axis shown as Scale) was set at 1-300, based on the magnitude of the noise peaks. Black vertical bars show locus positions in the human genome (hg19 assembly). Positions of genes, including *globin* genes, are shown under the plots.

**Supplementary Fig. S5. Identities of the DNA sequences between human *HBG1* and *HBG2* genes.** (**Upper**) Sequence identity was analyzed in the gene bodies and upstream regions (from -1 kb to -0.5 kb and from -0.5 kb to -1). (**Lower**) The results of a comparison of DNA sequences around the TSSs ( $\pm 0.5$  kb) are shown. The NGS reads corresponding to these genomic regions were manually counted.

**Supplementary Fig. S6. enChIP-Seq did not show chromosomal interactions between the 5'HS5 locus and irrelevant loci.** enChIP-Seq reads corresponding to *IFNG* and *ACTA1* genes ( $\pm 0.5$  kb around TSSs) were manually counted and fold enrichment with respect to input reads was analyzed. The detailed data are shown in Supplementary Table S4.

Supplementary Table S1. List of genomic regions detected in the differentiated state (sgRNA #6) by enChIP-Seq.

| chr   | start     | end       | length | summit | tags | sgRNA #6 (NaB-specific and constitutive peaks) |                 |        | gene2                                            |
|-------|-----------|-----------|--------|--------|------|------------------------------------------------|-----------------|--------|--------------------------------------------------|
|       |           |           |        |        |      | -10*LOG10(pvalue)                              | fold_enrichment | FDR(%) |                                                  |
| chr1  | 33526002  | 33526540  | 539    | 188    | 95   | 869.16                                         | 51.67           | 0      | .                                                |
| chr1  | 153586701 | 153587167 | 467    | 81     | 49   | 259.09                                         | 15.83           | 0      | .                                                |
| chr1  | 247240307 | 247240894 | 588    | 246    | 68   | 322.89                                         | 17.62           | 0      | 1654:NM_080388:S100A16;-1640:NM_020672:S100A14   |
| chr1  | 247240925 | 247241339 | 415    | 243    | 49   | 221.87                                         | 12.95           | 0      | -1220:NM_001204220:NM_033213:ZNF670              |
| chr10 | 15387617  | 15388319  | 703    | 369    | 382  | 3100                                           | 101.06          | 0      | .                                                |
| chr11 | 5311586   | 5312647   | 1062   | 595    | 783  | 3100                                           | 168.11          | 0      | .                                                |
| chr11 | 36122948  | 36123372  | 425    | 281    | 63   | 441.98                                         | 27.79           | 0      | .                                                |
| chr11 | 57669714  | 57670066  | 353    | 129    | 42   | 199.98                                         | 11.97           | 0      | .                                                |
| chr11 | 66057056  | 66057342  | 287    | 127    | 45   | 329.48                                         | 30.65           | 0      | 2317:NM_153266:TMEM151A                          |
| chr11 | 66131388  | 66131805  | 418    | 189    | 56   | 388.52                                         | 33.37           | 0      | -7485:NM_001532:SLC29A2                          |
| chr12 | 76347754  | 76348240  | 487    | 266    | 76   | 513.86                                         | 22.08           | 0      | .                                                |
| chr15 | 64162769  | 64163183  | 415    | 80     | 51   | 400.95                                         | 29.06           | 0      | .                                                |
| chr16 | 1359061   | 1359401   | 341    | 284    | 41   | 299.03                                         | 25.24           | 0      | 93:NM_003345:NM_194259:NM_194260:NM_194261:UBE2I |
| chr16 | 67522986  | 67523488  | 503    | 265    | 110  | 863.92                                         | 38.37           | 0      | 8400:NM_004691:ATP6V0D15773:NM_001138:AGRP1      |
| chr4  | 81093373  | 81093786  | 414    | 190    | 46   | 266.82                                         | 19.07           | 0      | .                                                |
| chr5  | 118784853 | 118785151 | 299    | 163    | 44   | 318.58                                         | 31.93           | 0      | 3285:NM_000414:NM_001199291:NM_001199292:HSD17B4 |
| chr6  | 116781574 | 116781978 | 405    | 138    | 41   | 208.29                                         | 13.35           | 0      | 982:NM_001010919:FAM26F                          |
| chr7  | 132001863 | 132002364 | 502    | 272    | 71   | 488.49                                         | 27.24           | 0      | .                                                |
| chr9  | 108639933 | 108640362 | 430    | 283    | 41   | 171.13                                         | 14.3            | 0      | .                                                |

Common (sgRNA #6 and #17)

Target site



**Supplementary Table S3. Enrichment of NGS reads corresponding to the *HBG1* and *HBG2* genes**

| Sample name                 | # Reads<br>Total | # Reads |                      | Normalized to total #reads<br>(column C / column B) | Fold enrichment to input<br>(enChIP / input) |
|-----------------------------|------------------|---------|----------------------|-----------------------------------------------------|----------------------------------------------|
|                             |                  | HBG1    | HBG2 (TSSs ± 0.5 kb) |                                                     |                                              |
| dCas9 (-) (input)           | 36,541,063       |         | 30                   | 8.21E-07                                            | -                                            |
| dCas9 (-) (enChIP)          | 34,309,199       |         | 24                   | 7.00E-07                                            | 0.85                                         |
| dCas9_NaB (input)           | 45,440,321       |         | 42                   | 9.24E-07                                            | -                                            |
| dCas9_NaB (enChIP)          | 47,223,361       |         | 32                   | 6.78E-07                                            | 0.73                                         |
| dCas9+sgRNA#6 (-) (input)   | 36,617,514       |         | 25                   | 6.83E-07                                            | -                                            |
| dCas9+sgRNA#6 (-) (enChIP)  | 45,609,281       |         | 34                   | 7.45E-07                                            | 1.09                                         |
| dCas9+sgRNA#6_NaB (input)   | 44,561,486       |         | 35                   | 7.85E-07                                            | -                                            |
| dCas9+sgRNA#6_NaB (enChIP)  | 33,069,913       |         | 59                   | 1.78E-06                                            | 2.27                                         |
| dCas9+sgRNA#17 (-) (input)  | 48,786,495       |         | 38                   | 7.79E-07                                            | -                                            |
| dCas9+sgRNA#17 (-) (enChIP) | 39,473,425       |         | 34                   | 8.61E-07                                            | 1.11                                         |
| dCas9+sgRNA#17_NaB (input)  | 40,252,370       |         | 24                   | 5.96E-07                                            | -                                            |
| dCas9+sgRNA#17_NaB (enChIP) | 24,118,085       |         | 57                   | 2.36E-06                                            | 3.96                                         |

**Supplementary Table S4. NGS reads corresponding to the *IFNG* and *ACTA1* genes**

| Sample name                 | # Reads<br>Total | # Reads<br>IFNG (TSS ± 0.5 kb) | Normalized to total #reads<br>(column C / column B) | Fold enrichment to input<br>(enChIP / input) |
|-----------------------------|------------------|--------------------------------|-----------------------------------------------------|----------------------------------------------|
| dCas9_(-) (input)           | 36,541,063       | 13                             | 3.56E-07                                            | -                                            |
| dCas9_(-) (enChIP)          | 34,309,199       | 15                             | 4.37E-07                                            | 1.23                                         |
| dCas9_NaB (input)           | 45,440,321       | 17                             | 3.74E-07                                            | -                                            |
| dCas9_NaB (enChIP)          | 47,223,361       | 20                             | 4.24E-07                                            | 1.13                                         |
| dCas9+sgRNA#6_(-) (input)   | 36,617,514       | 9                              | 2.46E-07                                            | -                                            |
| dCas9+sgRNA#6_(-) (enChIP)  | 45,609,281       | 15                             | 3.29E-07                                            | 1.34                                         |
| dCas9+sgRNA#6_NaB (input)   | 44,561,486       | 18                             | 4.04E-07                                            | -                                            |
| dCas9+sgRNA#6_NaB (enChIP)  | 33,069,913       | 17                             | 5.14E-07                                            | 1.27                                         |
| dCas9+sgRNA#17_(-) (input)  | 48,786,495       | 19                             | 3.89E-07                                            | -                                            |
| dCas9+sgRNA#17_(-) (enChIP) | 39,473,425       | 19                             | 4.81E-07                                            | 1.24                                         |
| dCas9+sgRNA#17_NaB (input)  | 40,252,370       | 13                             | 3.23E-07                                            | -                                            |
| dCas9+sgRNA#17_NaB (enChIP) | 24,118,085       | 11                             | 4.56E-07                                            | 1.41                                         |

| Sample name                 | # Reads<br>Total | # Reads<br>ACTA1 (TSS ± 0.5 kb) | Normalized to total #reads<br>(column C / column B) | Fold enrichment to input<br>(enChIP / input) |
|-----------------------------|------------------|---------------------------------|-----------------------------------------------------|----------------------------------------------|
| dCas9_(-) (input)           | 36,541,063       | 10                              | 2.74E-07                                            | -                                            |
| dCas9_(-) (enChIP)          | 34,309,199       | 14                              | 4.08E-07                                            | 1.49                                         |
| dCas9_NaB (input)           | 45,440,321       | 14                              | 3.08E-07                                            | -                                            |
| dCas9_NaB (enChIP)          | 47,223,361       | 13                              | 2.75E-07                                            | 0.89                                         |
| dCas9+sgRNA#6_(-) (input)   | 36,617,514       | 11                              | 3.00E-07                                            | -                                            |
| dCas9+sgRNA#6_(-) (enChIP)  | 45,609,281       | 17                              | 3.73E-07                                            | 1.24                                         |
| dCas9+sgRNA#6_NaB (input)   | 44,561,486       | 9                               | 2.02E-07                                            | -                                            |
| dCas9+sgRNA#6_NaB (enChIP)  | 33,069,913       | 6                               | 1.81E-07                                            | 0.90                                         |
| dCas9+sgRNA#17_(-) (input)  | 48,786,495       | 16                              | 3.28E-07                                            | -                                            |
| dCas9+sgRNA#17_(-) (enChIP) | 39,473,425       | 13                              | 3.29E-07                                            | 1.00                                         |
| dCas9+sgRNA#17_NaB (input)  | 40,252,370       | 10                              | 2.48E-07                                            | -                                            |
| dCas9+sgRNA#17_NaB (enChIP) | 24,118,085       | 5                               | 2.07E-07                                            | 0.83                                         |

**Supplementary Table S5. Primers used in this study**

| Number | Name                   | Sequence (5' → 3')                                   | Experiments                                                                          |
|--------|------------------------|------------------------------------------------------|--------------------------------------------------------------------------------------|
| 27420  | hHS5-TAL-Target-F      | ccagtttctccagtttcctttt                               | enChIP assays in Figure 2C (5'HS5)                                                   |
| 27421  | hHS5-TAL-Target-R      | ttttcaaatgcaaggtgatgc                                | enChIP assays in Figure 2C (5'HS5)                                                   |
| 27222  | hSox2-prom-F           | attggtcgtagaaaccatttatt                              | enChIP assays in Figure 2C (Sox2)                                                    |
| 27223  | hSox2-prom-R           | ctgccttgacaactcctgatacttt                            | enChIP assays in Figure 2C (Sox2)                                                    |
| 27915  | h5'HS5-3D-3'-ISceI-F   | (Biotin)ccggTAGGGATAACAGGGTAATttgagaaggtagggtgcatgag | 1 st PCR in proximity ligation assay in Figure 5A-C (Upper cases: I-Sce I site)      |
| 27880  | hZNF670-3D-F2          | gagctctggactcgggctca                                 | 1 st PCR in proximity ligation assay in Figure 5A                                    |
| 27863  | hZNF670-3D-F           | atctttgggtgaagtcccttt                                | 2nd PCR in proximity ligation assay in Figure 5A and PCR in Supplementary Figure S3A |
| 27864  | hZNF670-3D-R           | ccaagagatctggctgctaaca                               | 2nd PCR in proximity ligation assay in Figure 5A and PCR in Supplementary Figure S3A |
| 27865  | hMIR422A-3D-F          | ggctatcctagcttgctcagaa                               | 1 st PCR in proximity ligation assay in Figure 5B                                    |
| 28038  | hMIR422A-3D-F4         | ctggacagctcccatgctatta                               | 2nd PCR in proximity ligation assay in Figure 5B and PCR in Supplementary Figure S3B |
| 28039  | hMIR422A-3D-R4         | tactctggagctctgggtctgat                              | 2nd PCR in proximity ligation assay in Figure 5B and PCR in Supplementary Figure S3B |
| 27868  | hYIF1A-3D-R            | tatcagtgacagagctgccaagc                              | 1 st PCR in proximity ligation assay in Figure 5C                                    |
| 28040  | hYIF1A-3D-F3           | cgggaggacatttcagcac                                  | 2nd PCR in proximity ligation assay in Figure 5C and PCR in Supplementary Figure S3C |
| 28041  | hYIF1A-3D-R3           | aagccccaggatgctgactc                                 | 2nd PCR in proximity ligation assay in Figure 5C and PCR in Supplementary Figure S3C |
| 27771  | hZNF670-ZNF695-Ex1_2-F | agcttctgttctctgggacct                                | RT-PCR in Figure 6 (ZNF670-ZNF695)                                                   |
| 27772  | hZNF670-ZNF695-Ex1_2-R | cacatccctgaatgccaatagtc                              | RT-PCR in Figure 6 (ZNF670-ZNF695)                                                   |
| 27779  | hZNF670-Ex4-F2         | gttccccaggagatgtatgttc                               | RT-PCR in Figure 6 (ZNF670)                                                          |
| 27780  | hZNF670-Ex4-R2         | acgagatgcagttaccacagagc                              | RT-PCR in Figure 6 (ZNF670)                                                          |
| 27773  | hMIR422A-F             | gacttagggtcagaagcctgag                               | RT-PCR in Figure 6 (MIR422A)                                                         |
| 27774  | hMIR422A-R             | aagcttggctcaggacagag                                 | RT-PCR in Figure 6 (MIR422A)                                                         |
| 27782  | hTMEM151A-Ex2-F        | cttagatccccgagtgtattgtg                              | RT-PCR in Figure 6 (TMEM151A)                                                        |
| 27783  | hTMEM151A-Ex2-R        | cttagcttccacttcccca                                  | RT-PCR in Figure 6 (TMEM151A)                                                        |
| 27777  | hYIF1A-Ex1_2-F         | agcagctgcctcattagtagtc                               | RT-PCR in Figure 6 (YIF1A)                                                           |
| 27778  | hYIF1A-Ex1_2-R         | gaataaccaccgctgtgtcatc                               | RT-PCR in Figure 6 (YIF1A)                                                           |
| 27784  | hCNIH2-Ex1_4-F         | gcctccctcatcttcttgcac                                | RT-PCR in Figure 6 (CNIH2)                                                           |
| 27785  | hCNIH2-Ex1_4-R         | agtattctgggaccaccagcttc                              | RT-PCR in Figure 6 (CNIH2)                                                           |



Supplementary Table S6. Information on enChIP-Seq analysis

140318\_SN7001075L\_0319\_AC42GNACXX (Hiseq2500, 36 bp single end) reference: hg19

| Sample Name                 | Lane | Sample ID                            | Index  | Description           | Yield (Mbases) | % PF  | # Reads    | % of raw clusters per lane | % of >= Q30 Bases (PF) | Mean Quality Score (PF) Max =40 | % Align (PF) =% uniquely mapped reads | % Mismatch Rate (PF) | mode of sequencing | Library Prep Kit                                    | PCR cycles | Redundant rate |
|-----------------------------|------|--------------------------------------|--------|-----------------------|----------------|-------|------------|----------------------------|------------------------|---------------------------------|---------------------------------------|----------------------|--------------------|-----------------------------------------------------|------------|----------------|
| dCas9+sgRNA#6 (-) (enChIP)  | 7    | 140318_Hiseq3A_I7_001_Dr_Fujita_ChIP | ATCAC  | 1_HS5_no6_none        | 1,557          | 94.81 | 45,609,281 | 25.78                      | 98.03                  | 38.26                           | 80.15                                 | 0.20                 | Single-End         | TruSeq ChIP Sample Prep Kit (IP-202-1012, Illumina) | 18         | 6%             |
| dCas9+sgRNA#17 (-) (enChIP) | 7    | 140318_Hiseq3A_I7_010_Dr_Fujita_ChIP | TAGCTT | 2_HS5_no17_none       | 1,349          | 94.94 | 39,473,425 | 22.31                      | 98.10                  | 38.29                           | 79.61                                 | 0.20                 | Single-End         | TruSeq ChIP Sample Prep Kit (IP-202-1012, Illumina) | 18         | 6%             |
| dCas9+sgRNA#17_NaB (input)  | 7    | 140318_Hiseq3A_I7_011_Dr_Fujita_ChIP | GGCTAC | 8_HS5_no17_NaB_input  | 1,379          | 95.17 | 40,252,370 | 22.75                      | 98.17                  | 38.32                           | 75.34                                 | 0.21                 | Single-End         | TruSeq ChIP Sample Prep Kit (IP-202-1012, Illumina) | 18         | 4%             |
| dCas9+sgRNA#6_NaB (enChIP)  | 7    | 140318_Hiseq3A_I7_020_Dr_Fujita_ChIP | GTGGCC | 3_HS5_no6_NaB         | 1,141          | 95.82 | 33,069,913 | 18.69                      | 98.26                  | 38.33                           | 79.41                                 | 0.20                 | Single-End         | TruSeq ChIP Sample Prep Kit (IP-202-1012, Illumina) | 18         | 7%             |
| dCas9+sgRNA#17_NaB (enChIP) | 8    | 140318_Hiseq3A_I8_003_Dr_Fujita_ChIP | TTAGGC | 4_HS5_no17_NaB        | 835            | 96.20 | 24,118,085 | 14.04                      | 98.29                  | 38.35                           | 79.66                                 | 0.24                 | Single-End         | TruSeq ChIP Sample Prep Kit (IP-202-1012, Illumina) | 18         | 6%             |
| dCas9+sgRNA#6_NaB (input)   | 8    | 140318_Hiseq3A_I8_008_Dr_Fujita_ChIP | ACTTGA | 7_HS5_no6_NaB_input   | 1,516          | 94.48 | 44,561,486 | 25.94                      | 98.05                  | 38.29                           | 76.36                                 | 0.25                 | Single-End         | TruSeq ChIP Sample Prep Kit (IP-202-1012, Illumina) | 18         | 4%             |
| dCas9+sgRNA#6 (-) (input)   | 8    | 140318_Hiseq3A_I8_009_Dr_Fujita_ChIP | GATCAC | 5_HS5_no6_none_input  | 1,249          | 94.76 | 36,617,514 | 21.32                      | 98.02                  | 38.27                           | 74.73                                 | 0.26                 | Single-End         | TruSeq ChIP Sample Prep Kit (IP-202-1012, Illumina) | 18         | 4%             |
| dCas9+sgRNA#17 (-) (input)  | 8    | 140318_Hiseq3A_I8_025_Dr_Fujita_ChIP | ACTGAT | 6_HS5_no17_none_input | 1,644          | 93.62 | 48,786,495 | 28.40                      | 97.88                  | 38.23                           | 74.64                                 | 0.26                 | Single-End         | TruSeq ChIP Sample Prep Kit (IP-202-1012, Illumina) | 18         | 4%             |

141202\_SN7001075L\_0366\_AC5Y10ACXX (Hiseq2500, 36 bp single end) reference: hg19

| Sample Name        | Lane | Sample ID                            | Index  | Description    | Yield (Mbases) | % PF  | # Reads    | % of raw clusters per lane | % of >= Q30 Bases (PF) | Mean Quality Score (PF) Max =40 | % Align (PF) | % Mismatch Rate (PF) | mode of sequencing | Library Prep Kit                                    | PCR cycles | Redundant rate |
|--------------------|------|--------------------------------------|--------|----------------|----------------|-------|------------|----------------------------|------------------------|---------------------------------|--------------|----------------------|--------------------|-----------------------------------------------------|------------|----------------|
| dCas9_NaB (enChIP) | 1    | 141202_Hiseq3A_I1_001_Dr_Fujita_ChIP | ATCAC  | en_ChIP_NaB    | 1,620          | 95.32 | 47,223,361 | 27.55                      | 98.07                  | 38.38                           | 79.60        | 0.18                 | Single-End         | TruSeq ChIP Sample Prep Kit (IP-202-1012, Illumina) | 18         | 2%             |
| dCas9 (-) (enChIP) | 1    | 141202_Hiseq3A_I1_008_Dr_Fujita_ChIP | ACTTGA | en_ChIP_minus  | 1,182          | 95.70 | 34,309,199 | 20.01                      | 98.10                  | 38.39                           | 78.81        | 0.18                 | Single-End         | TruSeq ChIP Sample Prep Kit (IP-202-1012, Illumina) | 18         | 1%             |
| dCas9_NaB (input)  | 1    | 141202_Hiseq3A_I1_010_Dr_Fujita_ChIP | TAGCT  | Ip_input_NaB   | 1,517          | 92.73 | 45,440,321 | 26.51                      | 97.68                  | 38.27                           | 74.96        | 0.20                 | Single-End         | TruSeq ChIP Sample Prep Kit (IP-202-1012, Illumina) | 18         | 2%             |
| dCas9 (-) (input)  | 1    | 141202_Hiseq3A_I1_011_Dr_Fujita_ChIP | GGCTA  | Ip_input_minus | 1,228          | 93.37 | 36,541,063 | 21.32                      | 97.75                  | 38.29                           | 76.09        | 0.20                 | Single-End         | TruSeq ChIP Sample Prep Kit (IP-202-1012, Illumina) | 18         | 1%             |

Figure S1

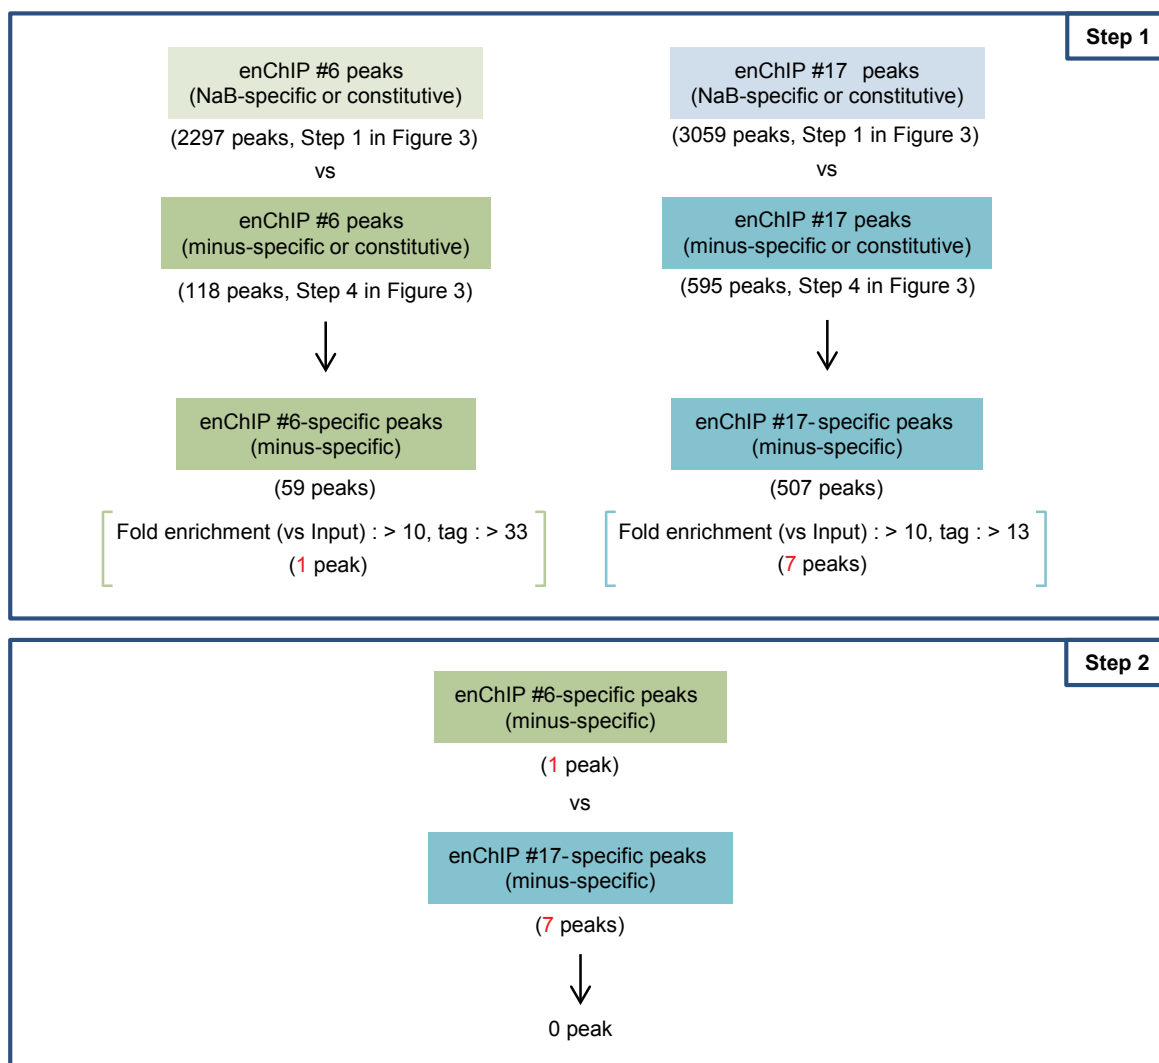

Figure S2

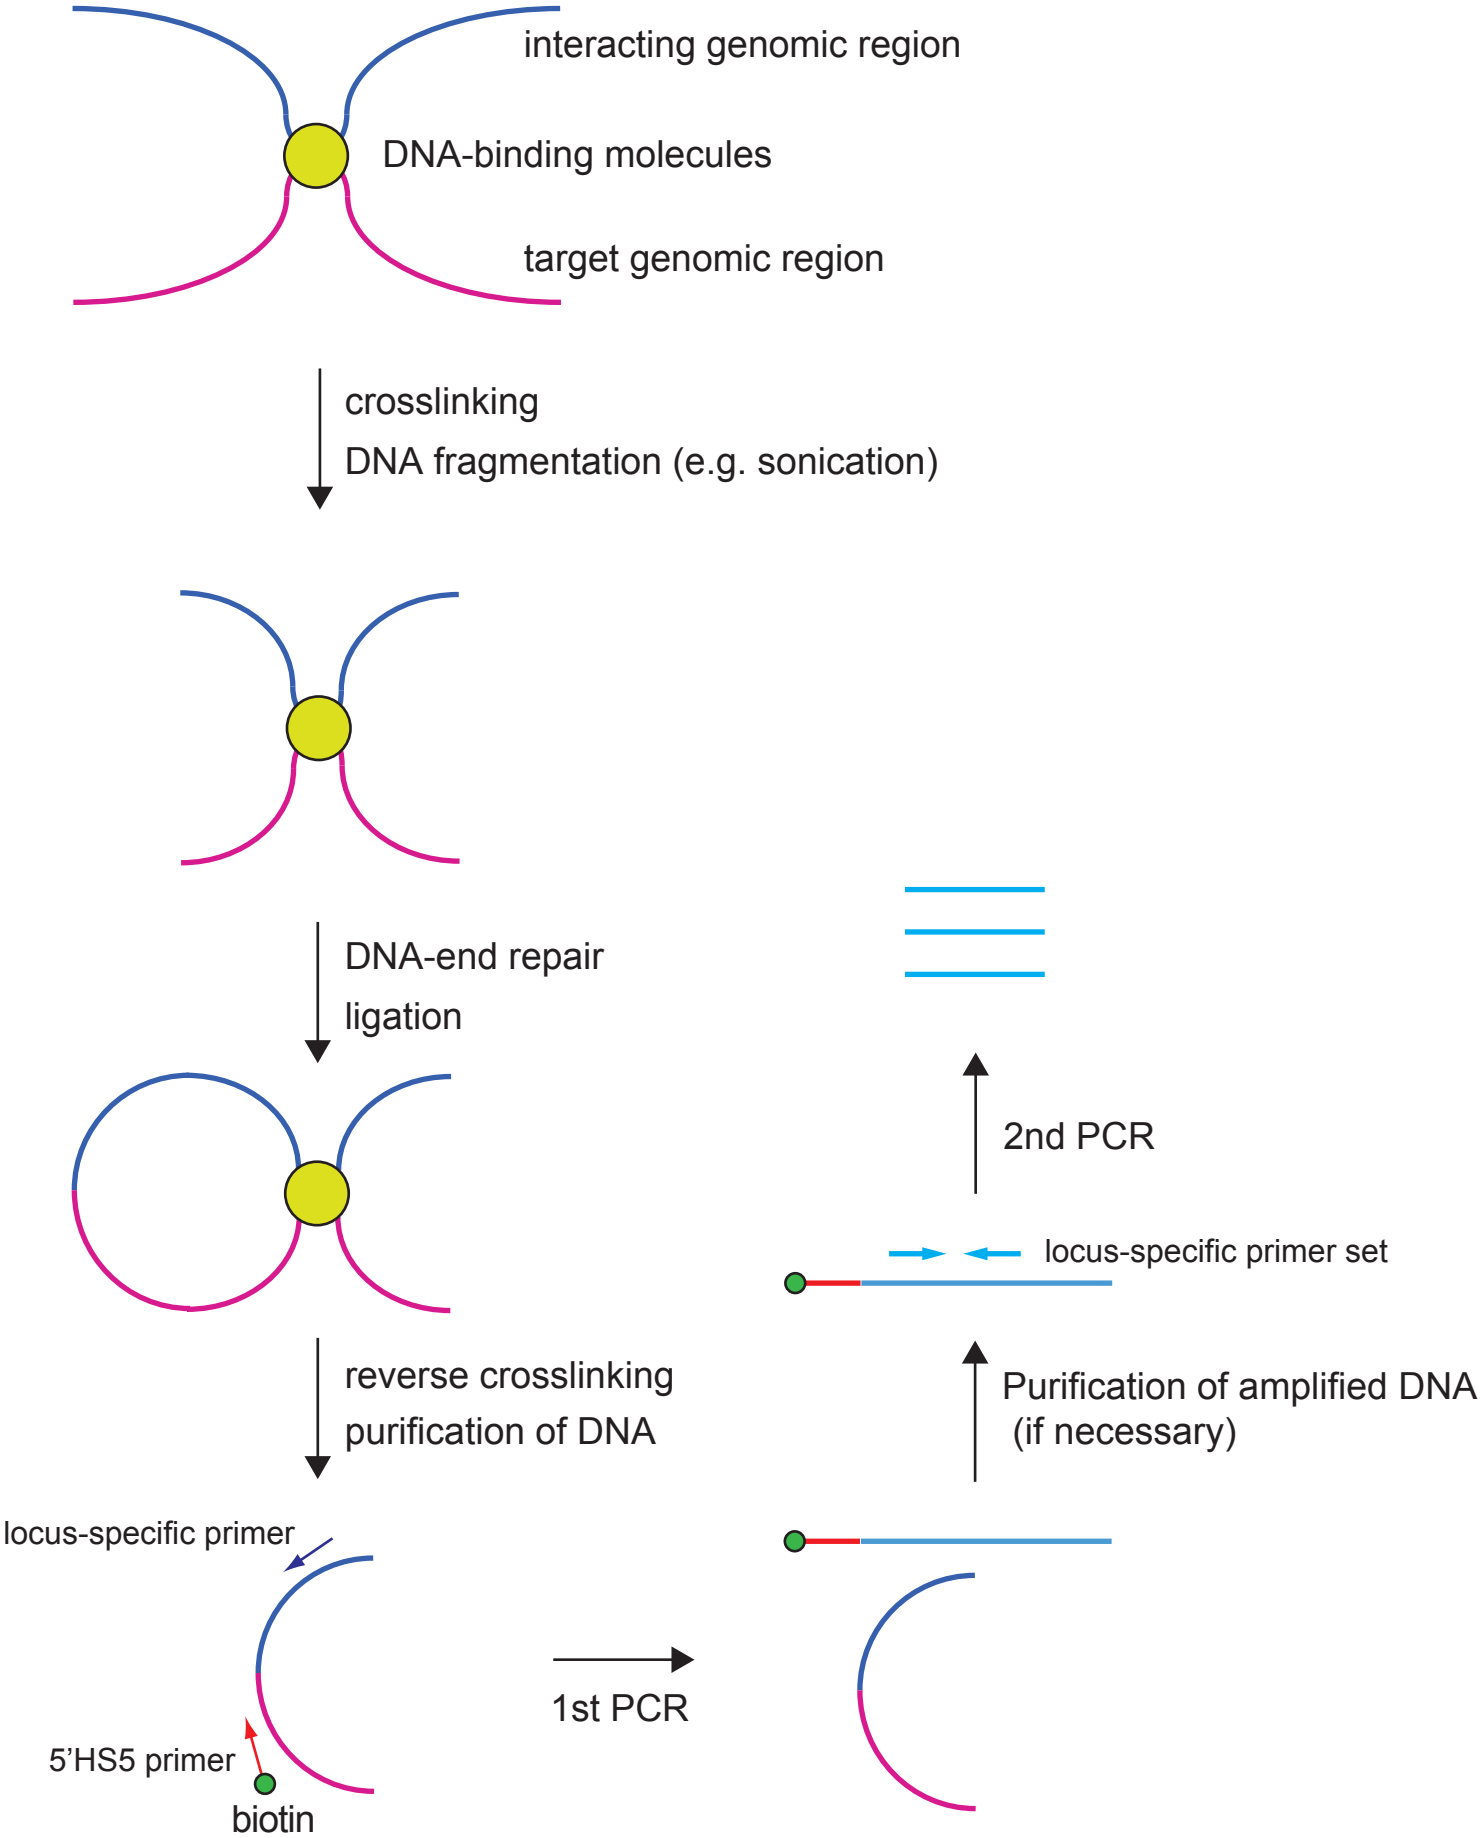

Figure S3

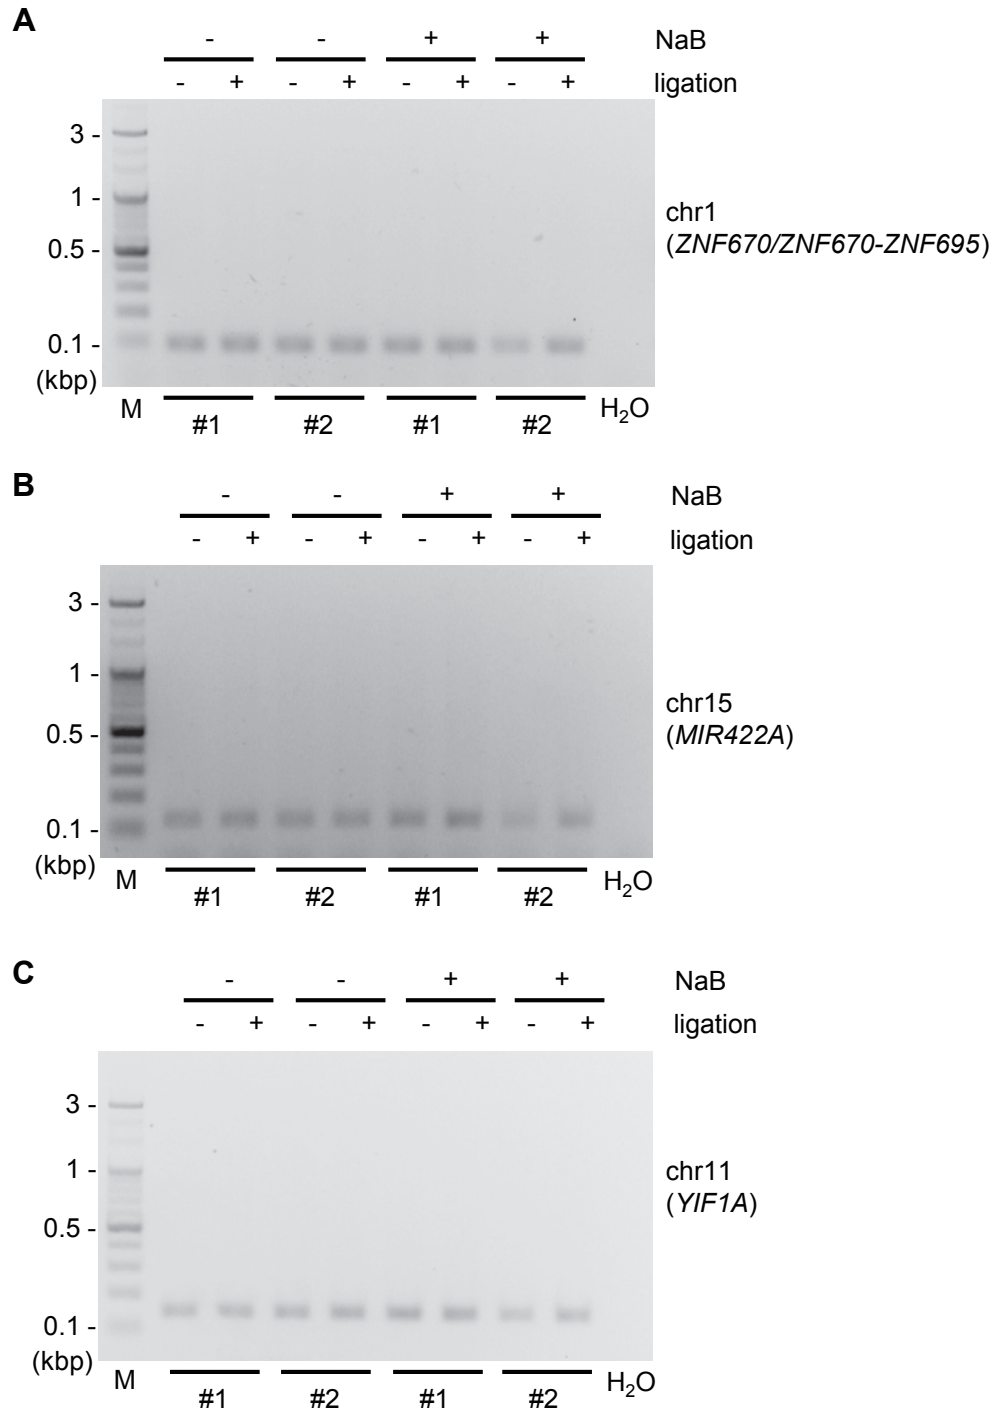

Figure S4

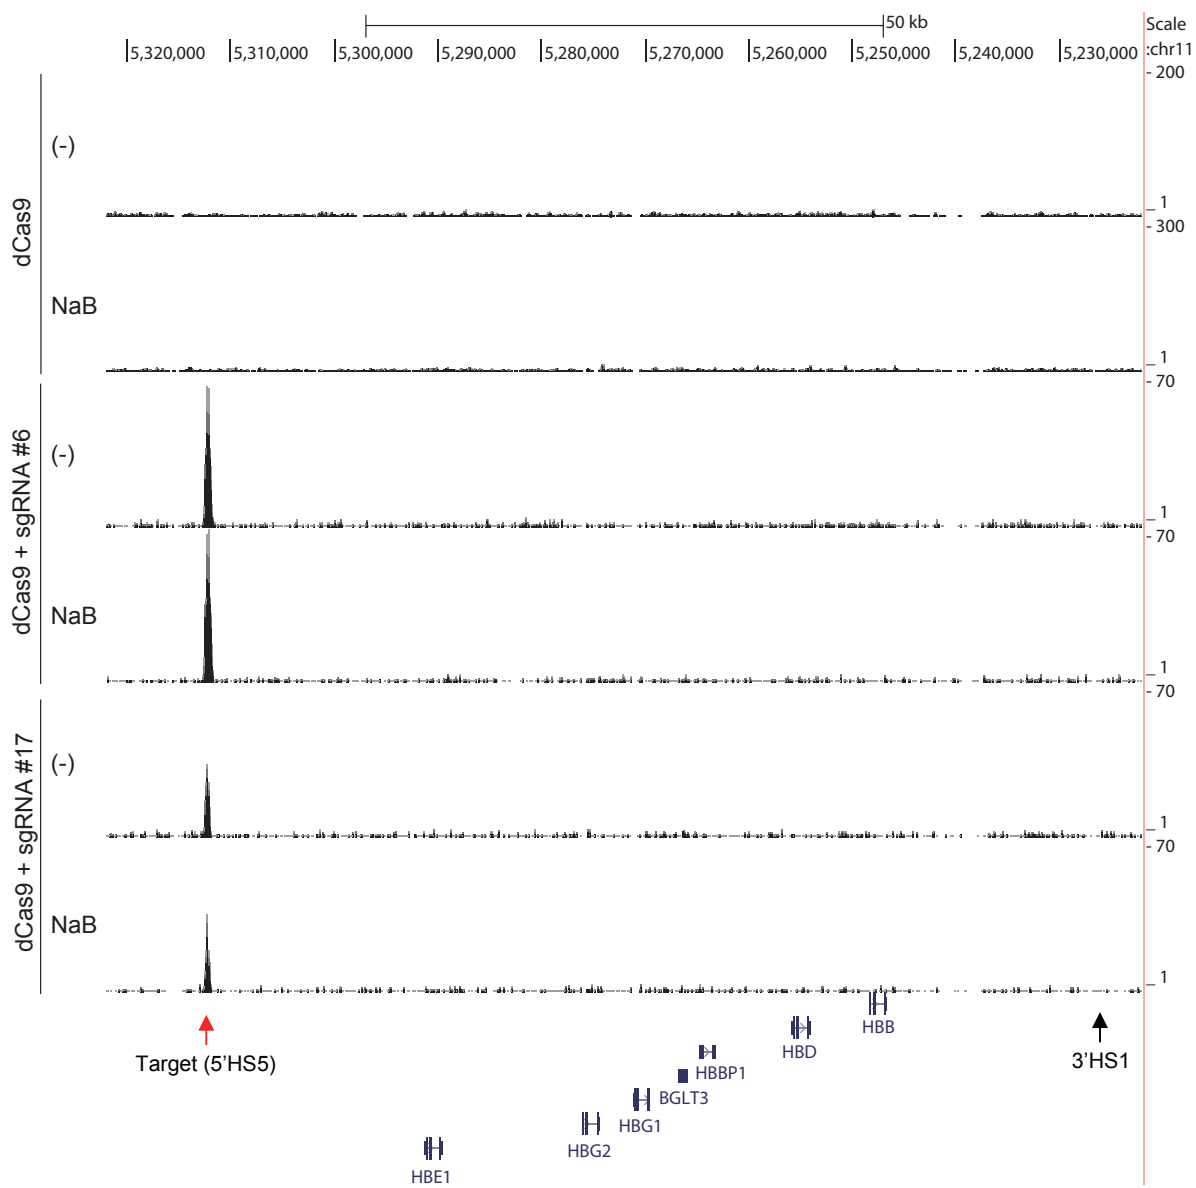

Figure S5

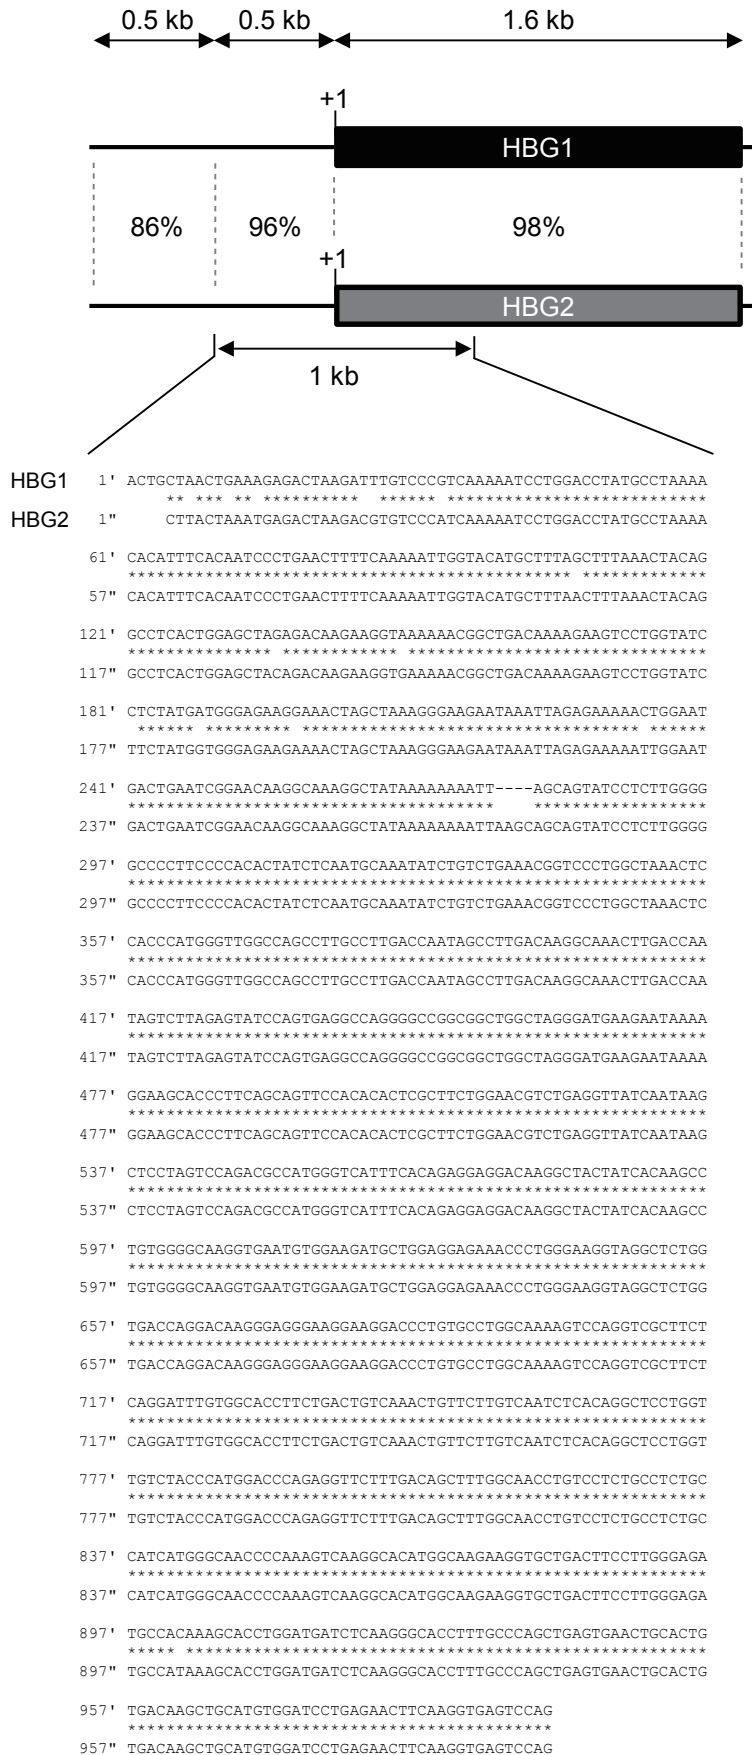

Figure S6

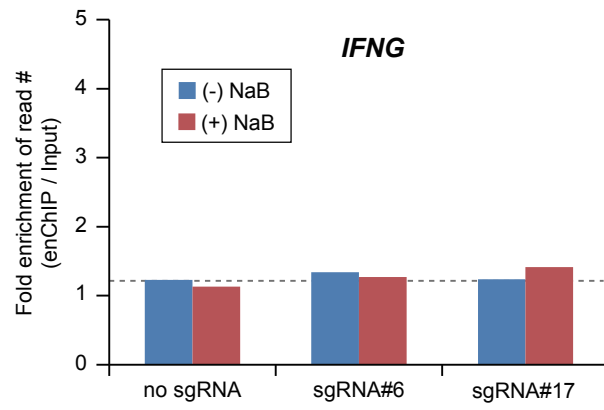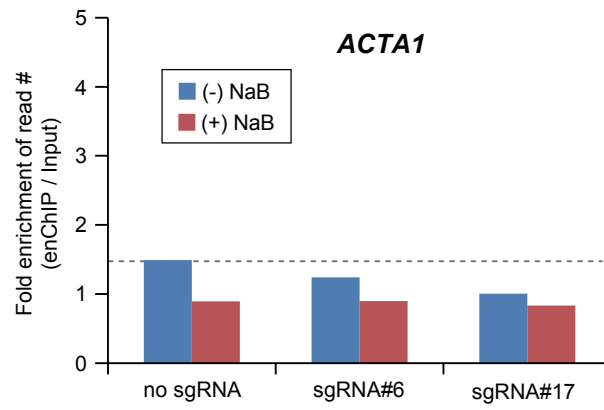

Supplement: dsx023_supp_2017_fujita_genes_cells_in_press.pdf [file dsx023_supp_2017_fujita_genes_cells_in_press.pdf]
