# Supplementary material for: Locus-specific ChIP combined with NGS analysis reveals genomic regulatory regions that physically interact with the Pax5 promoter in a chicken B cell line
Source: PubMed Central journal article supplement (PMC5737561; doi:10.1093/dnares/dsx023), 2017-06-06
Supplement: dsx023_supp_170329_data_for_reviewers.pdf [file dsx023_supp_170329_data_for_reviewers.pdf]

# Result of RNA-Seq

IRC11-1

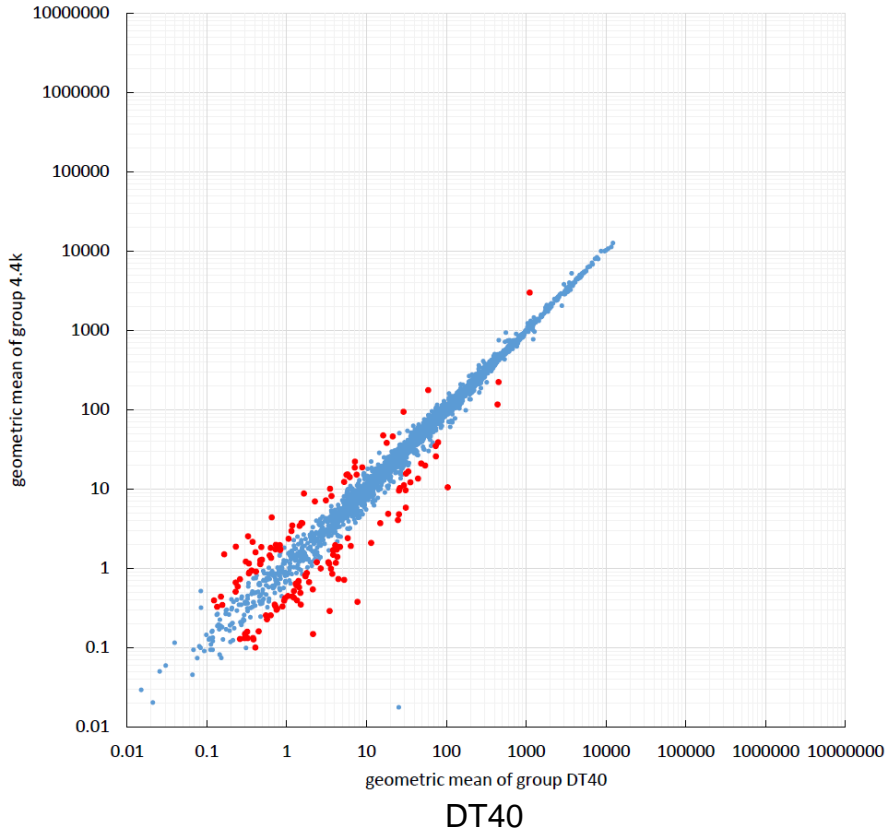

## Data for reviewers (1)

|             | 4.4k vs DT40 |             | 4.4k vs DT40 |
|-------------|--------------|-------------|--------------|
| tracking_id | Fold Change  | tracking_id | Fold Change  |
| MIR6572     | 1773.314     | ATP1B1      | -2.002       |
| MBOAT1      | 55.974       | MXRA8       | -2.032       |
| GPX2        | 10.717       | FUT4        | -2.032       |
| BCL2A1      | 9.918        | ENG         | -2.032       |
| CD82        | 9.075        | GLCCI1      | -2.039       |
| EMP1        | 8.117        | RFTN2       | -2.058       |
| COL1A2      | 6.727        | NOX1        | -2.088       |
| SYPL1       | 5.718        | LOC395933   | -2.103       |
| MIXL1       | 5.529        | SLC25A36    | -2.110       |
| PROM1       | 5.301        | ANKDD1A     | -2.245       |
| LOC417192   | 5.214        | LOC395100   | -2.265       |
| ZP1         | 5.203        | CDH1        | -2.272       |
| CRP         | 4.670        | GPM6B       | -2.315       |
| CIDEA       | 3.812        | MCAM        | -2.393       |
| COTL1       | 3.230        | ARID5B      | -2.409       |
| FAM65B      | 3.085        | GNOT1       | -2.447       |
| CDS         | 3.082        | SSX2IP      | -2.469       |
| CD72        | 2.950        | BMPR2       | -2.470       |
| LGALS1      | 2.922        | SDC4        | -2.488       |
| ANKRD1      | 2.912        | ANXA2       | -2.567       |
| GAS2L3      | 2.867        | FGF12       | -2.669       |
| MAPK11      | 2.858        | B3GNT5      | -2.693       |
| ROR1        | 2.838        | MMP2        | -2.717       |
| CCDC28B     | 2.838        | LAMP3       | -2.744       |
| NPL         | 2.619        | CPS1        | -2.782       |
| LOC420160   | 2.616        | IGF1R       | -2.812       |
| TLR3        | 2.581        | PRR5        | -2.927       |
| CGNRH-R     | 2.416        | TACSTD2     | -3.136       |
| NR3C1       | 2.310        | RSPH9       | -3.201       |
| MTSS1       | 2.280        | ST3GAL5     | -3.207       |
| CD247       | 2.232        | SALL4       | -3.336       |
| UCP3        | 2.201        | SYT1        | -3.344       |
| PLIN1       | 2.201        | NEURL1      | -3.430       |
| TXNRD1      | 2.153        | SLC31A2     | -3.628       |
| GSTA3       | 2.130        | ZAR1L       | -3.645       |
| MKRN3       | 2.071        | MAT1A       | -3.663       |
| PAX3        | 2.065        | CACNA2D1    | -3.804       |
|             |              | BEND7       | -3.836       |
|             |              | RBM38       | -4.041       |
|             |              | NSG1        | -4.310       |
|             |              | SNTB1       | -4.399       |
|             |              | GHRH        | -4.553       |
|             |              | NPTN        | -5.165       |
|             |              | PTPRS       | -5.322       |
|             |              | AICDA       | -5.339       |
|             |              | KLHL14      | -5.504       |
|             |              | AP1S3       | -6.092       |
|             |              | FZD2        | -6.096       |
|             |              | POPDC3      | -6.105       |
|             |              | USP2        | -6.122       |
|             |              | SMIM18      | -6.928       |
|             |              | PMP22       | -7.222       |
|             |              | FGF18       | -7.677       |
|             |              | MT3         | -9.954       |
|             |              | IL10        | -9.981       |
|             |              | PPARG       | -11.963      |
|             |              | SCIN        | -14.419      |
|             |              | SMAD3       | -17.605      |
|             |              | SRC         | -21.922      |
|             |              | SOX9        | -65.745      |
|             |              | FAM213A     | -252.950     |
|             |              | BVES        | -394.600     |
|             |              | HAND2       | -2261.502    |
|             |              | MIR1804     | -21350.537   |
|             |              | PAX5        | -1.193       |

## Results of iChIP-Seq and *in vitro* enChIP-Seq

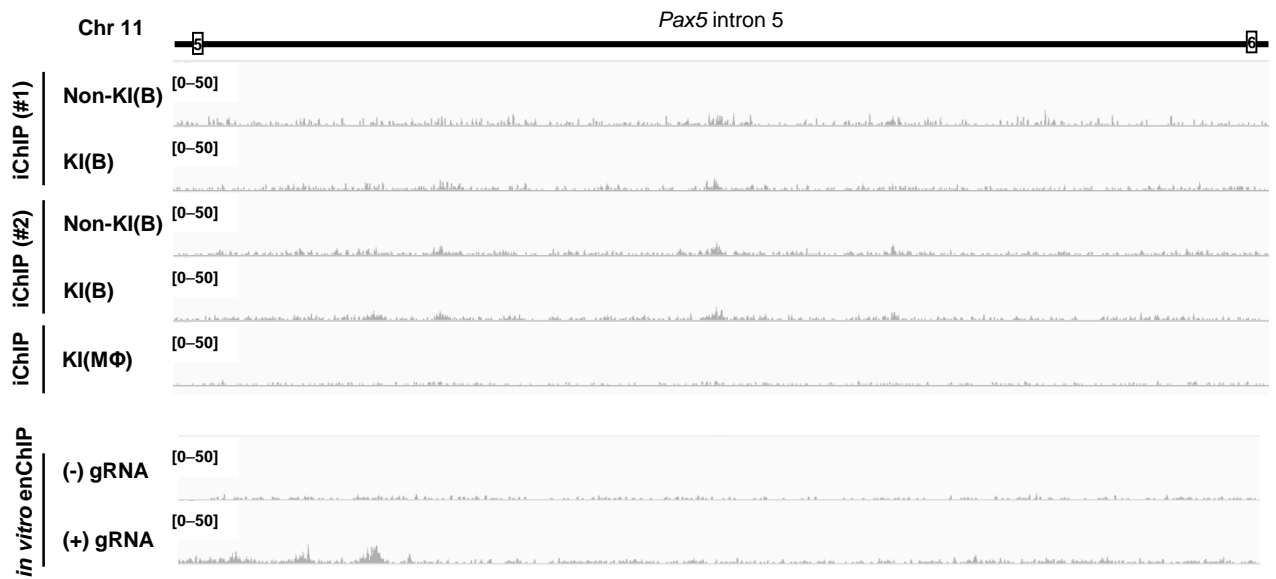

Data for reviewers (2)
