# Supplementary material for: Locus-specific ChIP combined with NGS analysis reveals genomic regulatory regions that physically interact with the Pax5 promoter in a chicken B cell line
Source: PubMed Central journal article supplement (PMC5737561; doi:10.1093/dnares/dsx023), 2017-06-06
Supplement: dsx023_supp_170401_supplementaryinfo.pdf [file dsx023_supp_170401_supplementaryinfo.pdf]

## **Supplementary Information**

### **Locus-specific ChIP combined with NGS analysis reveals genomic regulatory regions that physically interact with the *Pax5* promoter in a chicken B cell line**

Toshitsugu Fujita, Fusako Kitaura, Miyuki Yuno, Yutaka Suzuki, Sumio Sugano, and Hodaka Fujii

## **Supplementary Table and Figure Legends**

### **Supplementary Table S1. gRNA and primers used in this study**

### **Supplementary Table S2. Information on iChIP-Seq and *in vitro* enChIP-Seq analyses**

### **Supplementary Table S3. List of genomic regions detected by iChIP-Seq**

### **Supplementary Figure S1. Genomic regions that interact with the *Pax5* promoter region.**

(A) Thirty four genomic regions were commonly detected in Data set #1 (Fold enrichment, >7) and #2 (Fold enrichment, >7). (B) Ninety (75.6%) genomic regions in Data set #1 (Fold enrichment, >7) were detected in Data set #2 (Fold enrichment, >2). (C) Sixty two (59.0%) genomic regions in Data set #2 (Fold enrichment, >7) were detected in Data set #1 (Fold enrichment, >2).

### **Supplementary Figure S2. Isolation of the *Pax5* promoter region by *in vitro* enChIP. (A)**

Positions of gRNA and the primer set. (B) Target sequence of Pax5 gRNA. The protospacer adjacent motif (PAM) is underlined. (C) DNA yields of *in vitro* enChIP. DNA isolated by *in vitro* enChIP was used for quantitative real-time PCR.

### **Supplementary Figure S3. Representative peak positions detected by iChIP-Seq (#1).**

Three peak positions in chromosome 11 (A–C) and one peak position in chromosome 21 (D) are shown. The peak positions corresponding to iChIP-Seq (#2) are shown in Figure 4.

**Supplementary Figure S4. Representative peak positions not confirmed by *in vitro* enChIP-Seq.** (A–C) Two peak positions in chromosome 21 that were detected by iChIP-Seq but not by *in vitro* enChIP-Seq.

**Supplementary Figure S5. Prediction of potential off-target binding sites.** Potential off-target binding sites for Pax5 gRNA were predicted using a CRISPR design tool (<http://crispr.mit.edu/>) and the chicken genome reference galGal4.

**Supplementary Figure S6. Intra-chromosomal interaction with the *Pax5* promoter region.** Intra-chromosomal interactions in Data set #1 (Fold enrichment, >2) and #2 (Fold enrichment, >2) are shown.

**Supplementary Figure S7. Distribution of identified genomic regions in chromosome 21.**

**Supplementary Figure S8. The LexA BE insertion site and Pax5 gRNA-targeted site in the *Pax5* promoter.** The genomic region upstream from nucleotide -1 is shown.

**Supplementary Figure S9. Representative peak positions constitutively detected by iChIP-Seq in KI(B) and KI(MΦ).** Two representative peak positions on chromosome 21 are shown.

**Supplementary Figure S10. *in vitro* enChIP-Seq with DT40(MΦ).** (A) Trans-differentiation of DT40 into a macrophage-like cell by stable expression of chicken C/EBPβ. (B) Silencing of *Pax5* and *AID* transcription in the macrophage-like cell DT40(MΦ). Expression levels of *Pax5* and *AID* mRNA were quantified by real-time RT-PCR and

normalized against *GAPDH* mRNA (mean  $\pm$  s.e.m., n = 3); the mRNA levels in DT40 were defined as 1. (C) *M-CSFR* transcription in DT40(M $\Phi$ ). *M-CSFR* transcription was confirmed by RT-PCR analysis. (D) Unsuccessful isolation of the *Pax5* promoter region from DT40(M $\Phi$ ) by *in vitro* enChIP. The images of *in vitro* enChIP-Seq with DT40 in Figure 3C are also shown here for comparison with that of *in vitro* enChIP-Seq with DT40(M $\Phi$ ).

**Supplementary Figure S11. CRISPR-mediated locus deletion.** (A) Schematic depiction of the loci in chromosome 11, which were identified as those interacting with the *Pax5* promoter region in a B cell-specific manner. One allele is shown. The interacting regions are shown with gray triangles. Numbers indicate target sites of sgRNAs. (B) Scheme of CRISPR-mediated locus deletion. (C) Target sequences of sgRNAs. (D and E) Scheme of CRISPR-mediated locus deletion in DT40. WT indicates intact DT40.

**Supplementary Figure S12. Confirmation of CRISPR-mediated locus deletion by genotyping PCR.** (A) Depiction of the genomic regions in each cell clone. Primer positions used in genotyping PCR are shown. (B) Results of genotyping PCR.

## **Supplementary Materials and Methods**

### **Trans-differentiation of DT40 cells into macrophage-like cells.**

For trans-differentiation into macrophage-like cells, DT40 cells ( $1 \times 10^7$ ) were co-transfected with 110  $\mu\text{g}$  of linearized cC/EBP $\beta$ /pEF (Fujita et al. 2015) and 3  $\mu\text{g}$  of puromycin-resistance gene by electroporation. The cells were selected in the presence of puromycin (0.35  $\mu\text{g}/\text{ml}$ ). The surviving cell colonies were individually picked and expanded. An established cell line was used as DT40(M $\Phi$ ) in Supplementary Figure S8.
