# Supplementary material for: Locus-specific ChIP combined with NGS analysis reveals genomic regulatory regions that physically interact with the Pax5 promoter in a chicken B cell line
Source: PubMed Central journal article supplement (PMC5737561; doi:10.1093/dnares/dsx023), 2017-06-06
Supplement: dsx023_supplfigures.pdf [file dsx023_supplfigures.pdf]

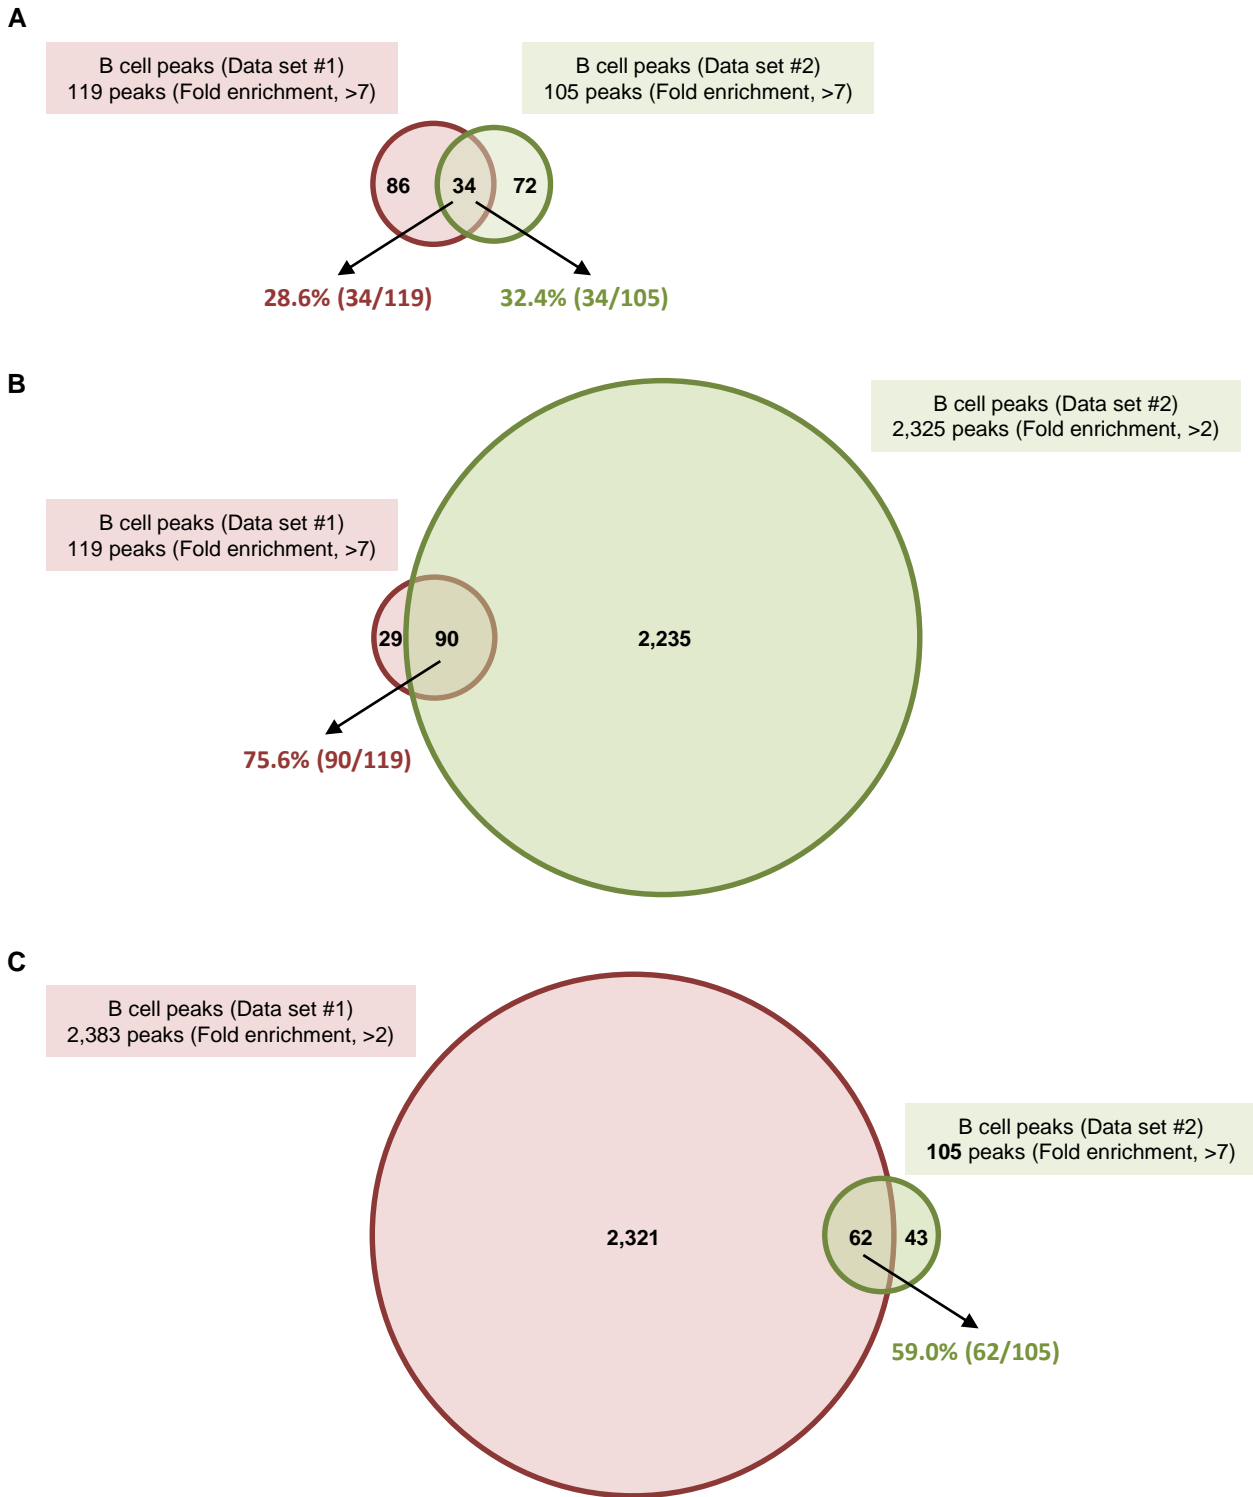

Supplementary Figure S1

**A**

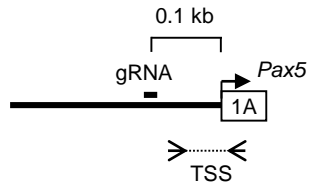

**B**

CGGCAGGCTCGGGTGCGCCTGGG

**C**

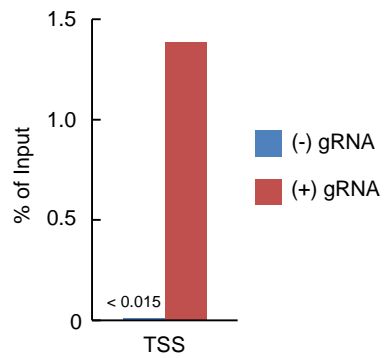

Supplementary Figure S2

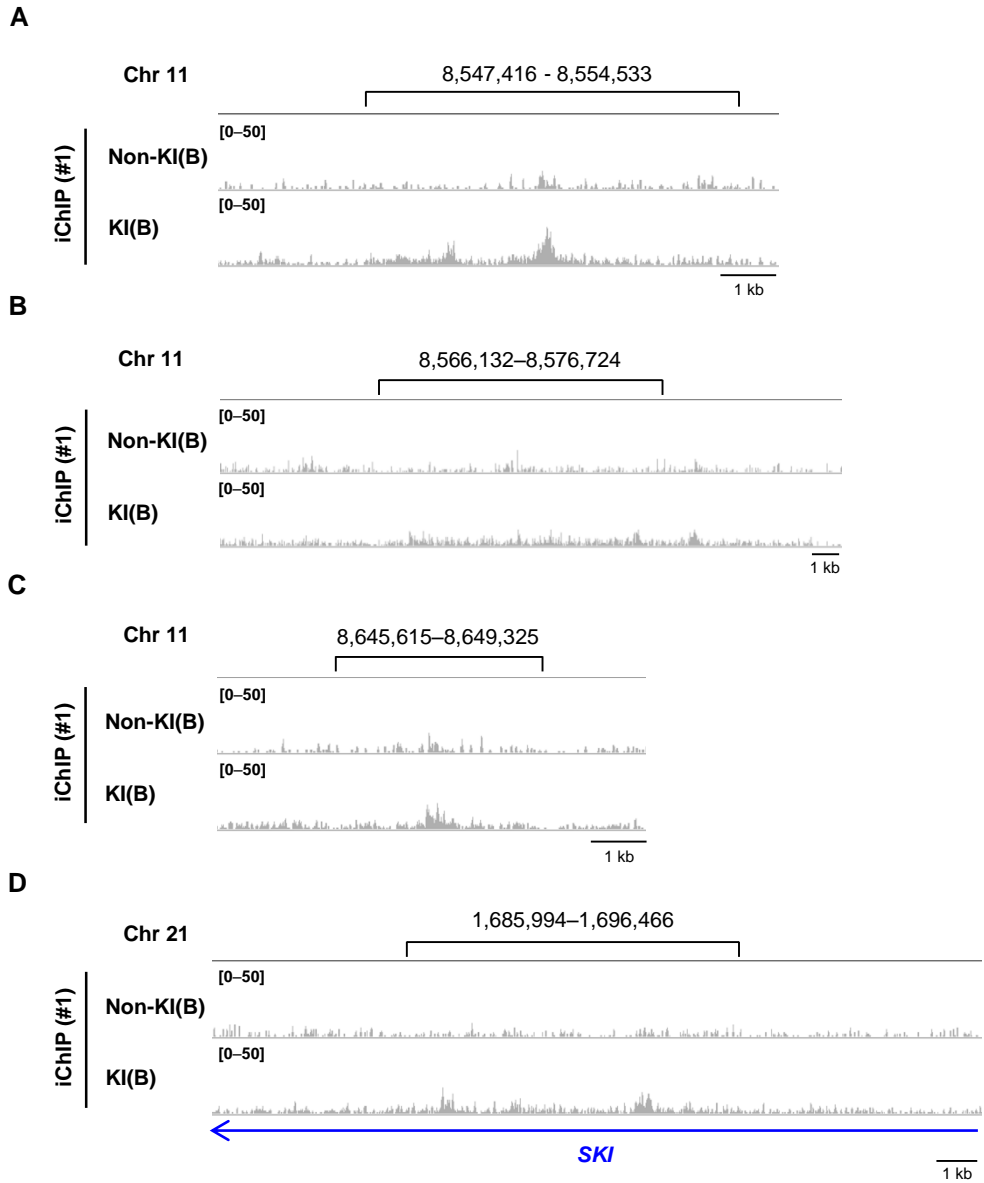

Supplementary Figure S3

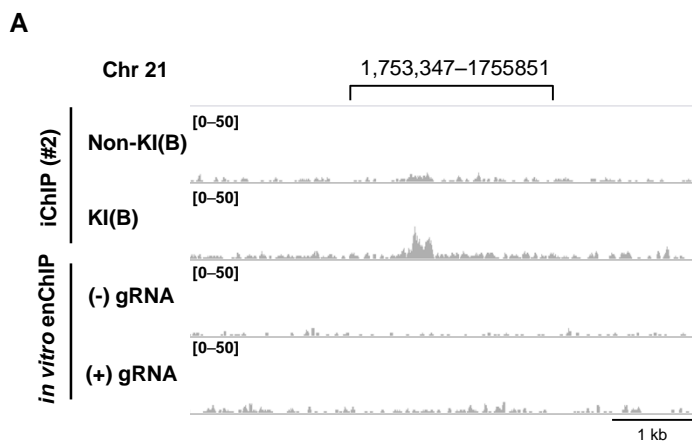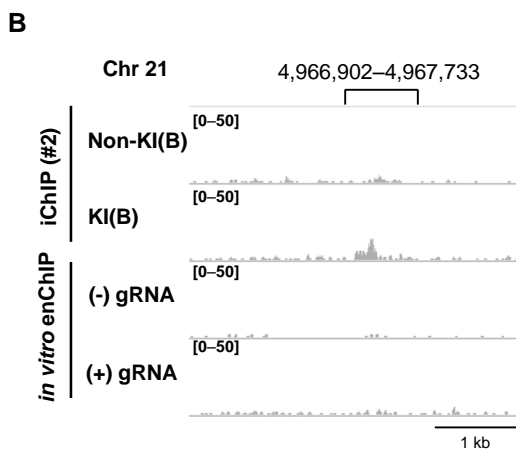

Supplementary Figure S4

| <b>sequence</b>          | <b>score</b> | <b>mismatches</b>  | <b>locus</b>    |
|--------------------------|--------------|--------------------|-----------------|
| CGTCAGGCTCTGCTGGCCTCGG   | 0.6          | 3MMs [3:11:13]     | chr3:-99566330  |
| CGGGGGCCCTGGTGGCCTGGG    | 0.5          | 4MMs [4:5:9:11]    | chr15:-11125782 |
| TTGCAGGCCCGGCTGGCCTGGG   | 0.4          | 4MMs [1:2:9:13]    | chr12:+11477384 |
| TGTCAGGCTCTGCTGGCCTGGG   | 0.3          | 4MMs [1:3:11:13]   | chr3:+99518274  |
| CGGCAGCCACGGGTCCGCCTCGG  | 0.3          | 3MMs [7:9:15]      | chr9:-908349    |
| GGGCAGGATCGCGTGGCATTGG   | 0.3          | 4MMs [1:8:12:19]   | chr4:+3876999   |
| GGGCTGTCTCGGGTGGGCCTGGG  | 0.2          | 4MMs [1:5:7:16]    | chr5:+57943847  |
| CTGCAGGCTCCCGTGTCTCCTGAG | 0.2          | 4MMs [2:11:12:17]  | chr3:-17761948  |
| GGGCAGGCCCGGGTGGCCTCAG   | 0.2          | 4MMs [1:8:9:16]    | chr8:+7479787   |
| AGGCAGGACCCGGTGTGCCTTGG  | 0.2          | 4MMs [1:8:9:16]    | chr1:-34513890  |
| CCGGAGGCTCCGGTGGCCTCAG   | 0.1          | 4MMs [2:4:11:16]   | chrZ:+19851342  |
| CTGCAGGCACGGCTGCACCTCGG  | 0.1          | 4MMs [2:9:13:17]   | chr24:-1742686  |
| CGGCGGGCGGGGTGTGCCTAGG   | 0.1          | 4MMs [5:9:10:16]   | chr2:+85697950  |
| AGGGAGGCTCGGGTGGGCCCGGG  | 0.1          | 4MMs [1:4:16:20]   | chr2:+115166870 |
| CGGCGTGTGGGGCGGCCTAGG    | 0.1          | 4MMs [5:6:10:14]   | chr21:+671425   |
| CTGCAGGCTGGGGTGCAGCTTGG  | 0.1          | 4MMs [2:10:17:18]  | chr7:+29178289  |
| CAGCAGGCTCTGGTGCACATGGG  | 0.1          | 4MMs [2:11:17:19]  | chr9:-22780280  |
| CTGCAGCCTCGAGTGGCCTCAG   | 0.1          | 4MMs [2:7:12:16]   | chr5:+44604323  |
| CGGCAGGCAGGGAGGCCTCGG    | 0.1          | 4MMs [9:10:11:14]  | chr18:+5449056  |
| CTGCAGGCTCAGGAGCCCTTGG   | 0.1          | 4MMs [2:11:14:17]  | chr23:-3037645  |
| GGGCAGGCTTGGGAGAGCCTGGG  | 0.0          | 4MMs [1:10:14:16]  | chr27:+1435846  |
| CTGCAGTCTCGGGTGGGACTTAG  | 0.0          | 4MMs [2:7:16:18]   | chr4:+86154512  |
| CGGCATCCTCGGGCCCGCCTGGG  | 0.0          | 4MMs [6:7:14:15]   | chr4:-1601108   |
| CGCCAGGCCCGGGAGAGCCTGAG  | 0.0          | 4MMs [3:9:14:16]   | chr1:-34110060  |
| CGGCAGGCTGGGGTGTGACCAAG  | 0.0          | 4MMs [10:16:18:20] | chr8:-21181895  |
| CGGCATGCTCAGGTGTGTCTGAG  | 0.0          | 4MMs [6:11:16:18]  | chrZ:+55687786  |
| CGGCAGGCTCGGCTGTCCGTGGG  | 0.0          | 4MMs [13:16:17:19] | chr11:-1192610  |
| CGGCAGGCTCGGATTAGCTCGG   | 0.0          | 4MMs [13:15:17:18] | chr23:+5009064  |
| CGGCAGGCCCGGGAGCGGGTAAG  | 0.0          | 4MMs [9:14:18:19]  | chrZ:+9069818   |

## Supplementary Figure S5

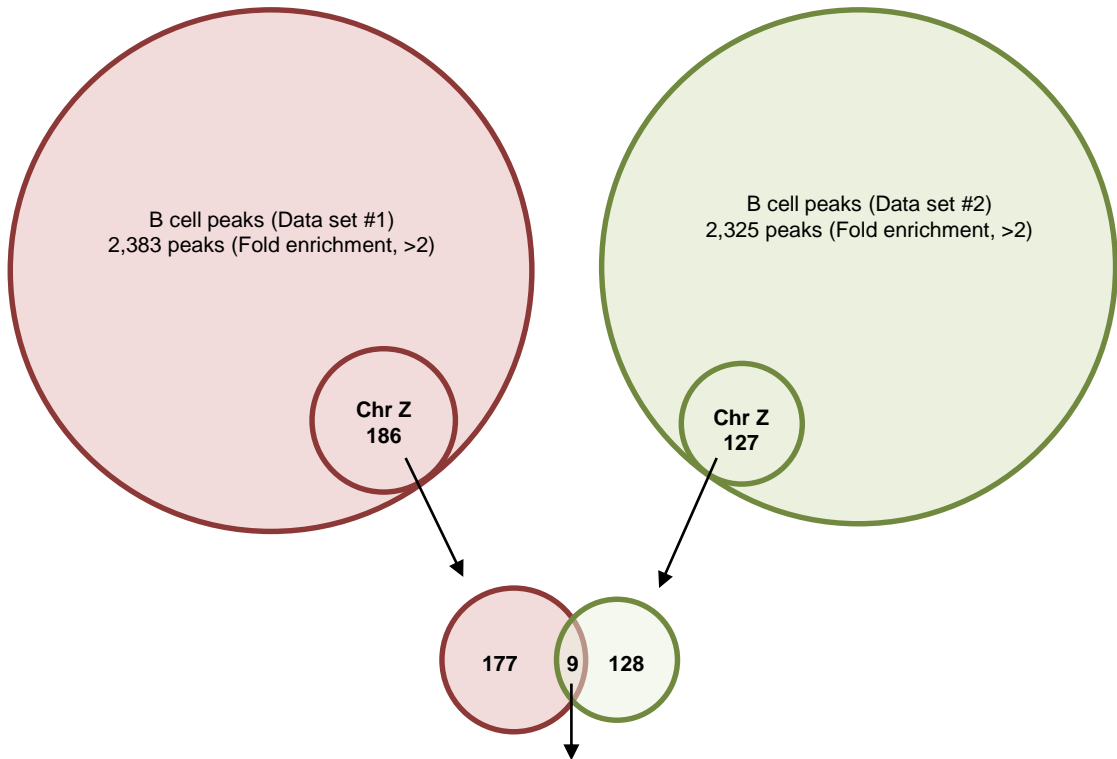

| Data set #1 |          |          |        |        |      |                      | Data set #2     |          |          |        |        |      |                      |                 |                      |     |
|-------------|----------|----------|--------|--------|------|----------------------|-----------------|----------|----------|--------|--------|------|----------------------|-----------------|----------------------|-----|
| chr         | start    | end      | length | summit | tags | $-\log_{10}(pvalue)$ | fold_enrichment | start    | end      | length | summit | tags | $-\log_{10}(pvalue)$ | fold_enrichment | fwd                  | rev |
| chrZ        | 331146   | 332935   | 1790   | 1495   | 103  | 85.73                | 4.17            | 331283   | 333044   | 1762   | 1431   | 110  | 55.55                | 2.77            |                      |     |
| chrZ        | 8943565  | 8944403  | 839    | 303    | 46   | 54.81                | 5.41            | 8943522  | 8944983  | 1462   | 363    | 73   | 52.17                | 3.77            |                      |     |
| chrZ        | 40367218 | 40367928 | 711    | 517    | 117  | 221.15               | 9.5             | 40367267 | 40368168 | 902    | 468    | 162  | 64.4                 | 6.21            |                      |     |
| chrZ        | 52573289 | 52574274 | 986    | 470    | 48   | 106.46               | 8.9             | 52573401 | 52573979 | 579    | 332    | 27   | 62.3                 | 6.85            |                      |     |
| chrZ        | 65614805 | 65616234 | 1430   | 559    | 142  | 69.47                | 6.07            | 65614834 | 65615956 | 1123   | 566    | 105  | 95.88                | 5.16            |                      |     |
| chrZ        | 66066227 | 66070713 | 4487   | 1678   | 289  | 63.26                | 3.98            | 66066776 | 66070524 | 3749   | 1112   | 286  | 71.04                | 3.41            |                      |     |
| chrZ        | 73039200 | 73040445 | 1246   | 503    | 138  | 60.37                | 4.84            | 73039175 | 73040354 | 1180   | 521    | 151  | 57.02                | 3.68            |                      |     |
| chrZ        | 73405844 | 73406350 | 507    | 315    | 25   | 50.95                | 4.91            | 73405854 | 73406498 | 645    | 305    | 25   | 55.74                | 7.19            |                      |     |
| chrZ        | 81611786 | 81613470 | 1685   | 1108   | 597  | 3100                 | 115.99          | 81611754 | 81613591 | 1838   | 1161   | 526  | 3100                 | 74.37           | 2090:PAX5:NM_204424, |     |

Supplementary Figure S6

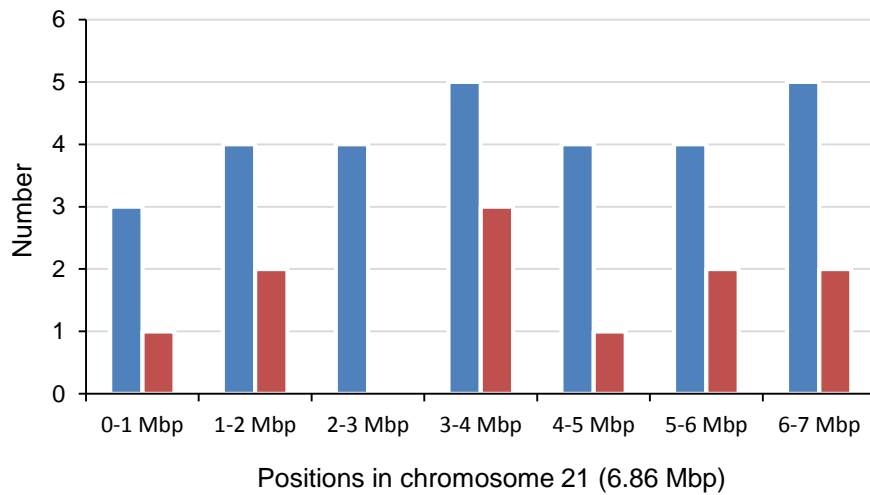

- 29 peaks in chromosome 21, which were identified by iChIP-Seq (Step 3 in Figure 2)
- 11 peaks in chromosome 21, which were confirmed by *in vitro* enChIP-Seq (Figure 3D)

## Supplementary Figure S7

LexA BE

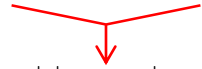

caccgcagccactgcagccccagcccggctccgggcatcagtcgccccttcgcct  
ccttctctcgcccgtagacacgcagcgcggggaggggtaacggggccgcgcagggg  
tccccccgcccgcagggcaaagtcacgttccgccctcgcggcggggagcggag  
aaggggaagtgggcggcagggcggggcgccgggcgcggccgggctgcgggtgtc  
ggcgggccaaggcgggtccgggtccacgcggcggcggagttggtgct**cggcaggc**  
**tcgggtgcgcctggg**gacatcctgtgatgctgcagcgcacaggacatgatctcac  
acggcgaggggctccgcggcttcttaatcatttcacgggtccttcagaggc

-1

Pax5 gRNA

Supplementary Figure S8



**A**

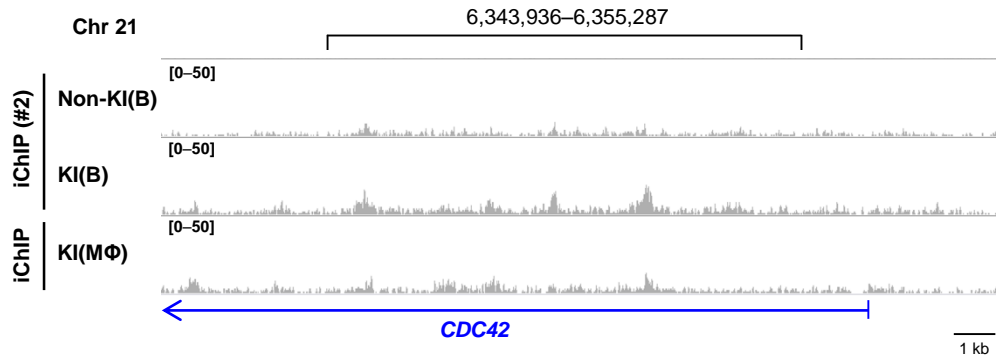

**B**

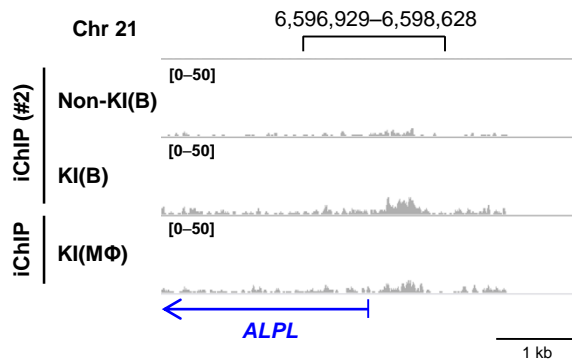

Supplementary Figure S9

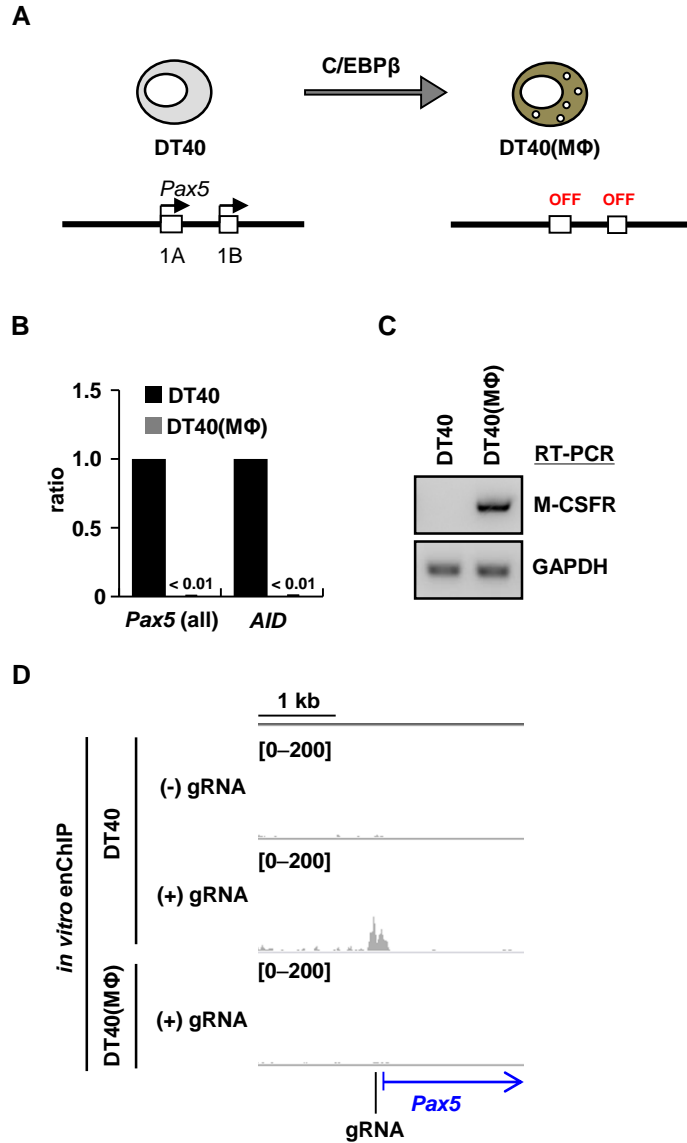

Supplementary Figure S10

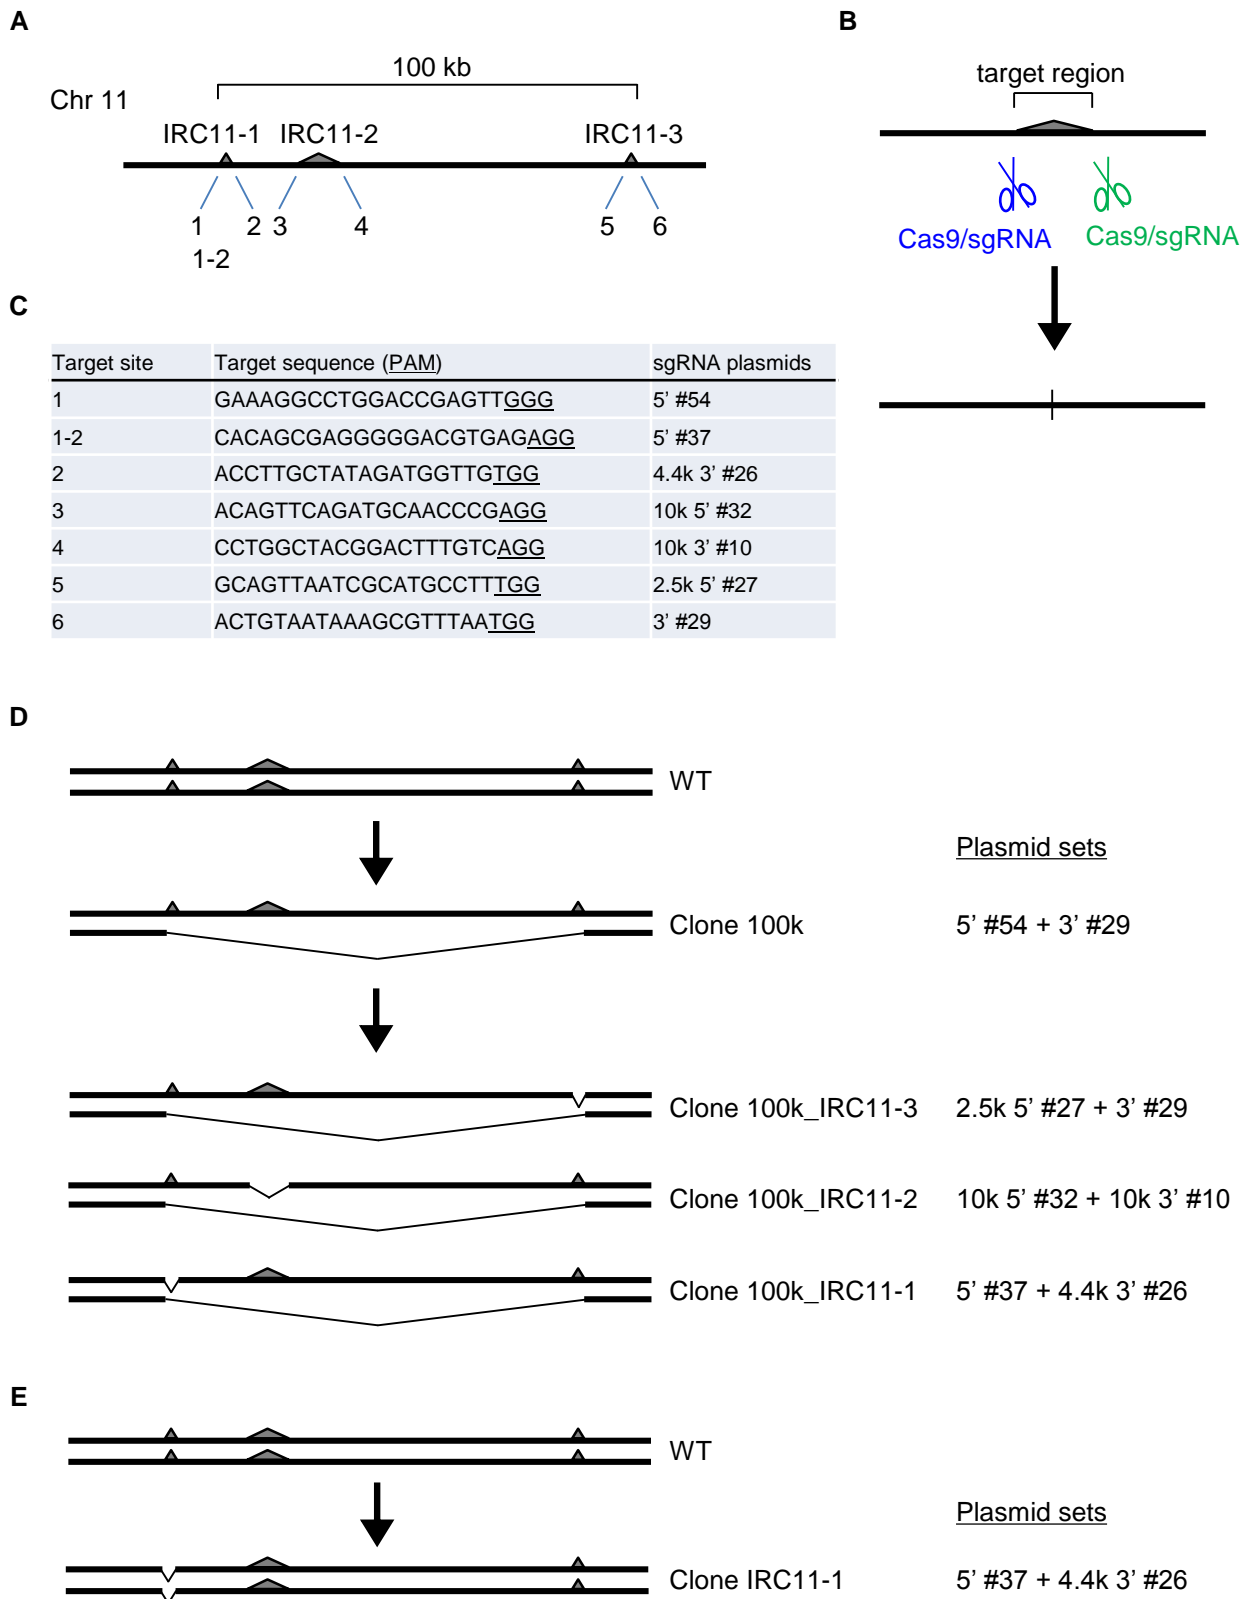

Supplementary Figure S11

**A**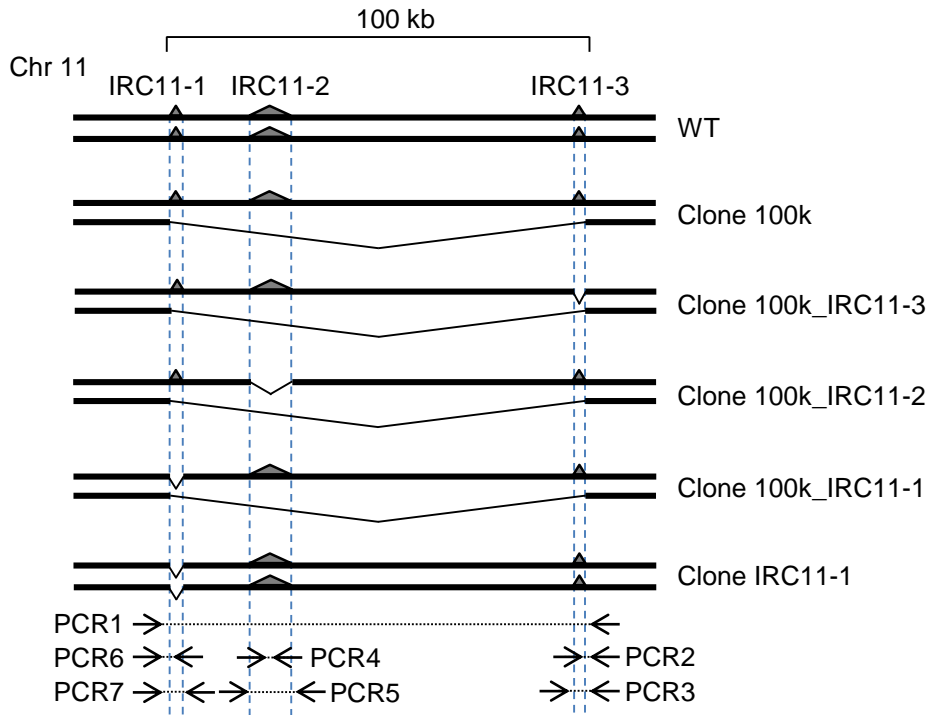**B**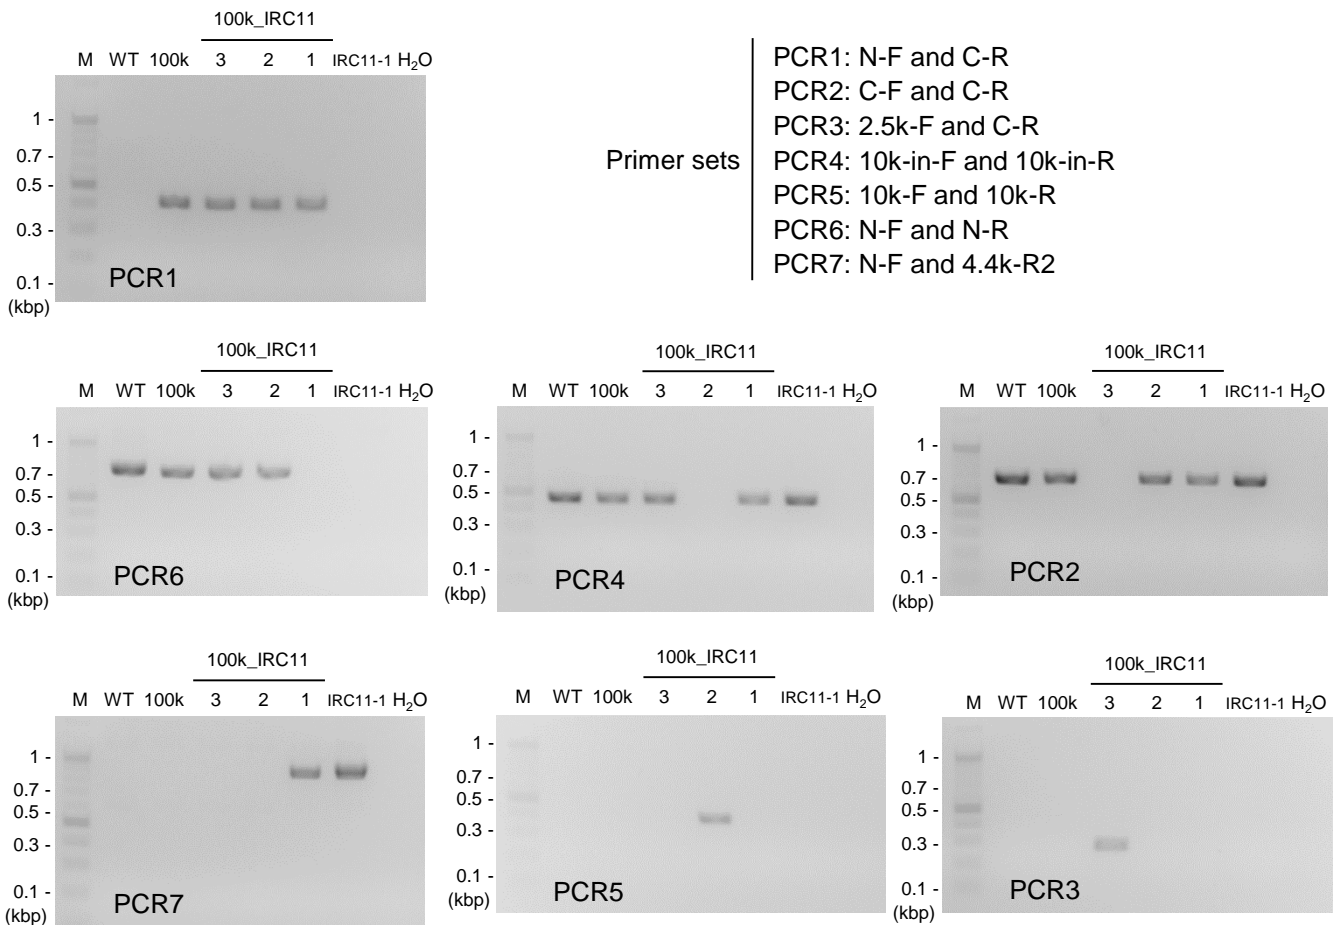

M: DNA ladder marker
